Version dated: March 3, 2017

RH: CLADOGENETIC AND ANAGENETIC MODELS OF CHROMOSOME  
EVOLUTION

# Cladogenetic and Anagenetic Models of Chromosome Number Evolution: a Bayesian Model Averaging Approach

WILLIAM A. FREYMAN<sup>1</sup> AND SEBASTIAN HÖHNA<sup>1,2</sup>

<sup>1</sup>*Department of Integrative Biology, University of California, Berkeley, CA, 94720, USA;*

<sup>2</sup>*Department of Statistics, University of California, Berkeley, CA, 94720, USA*

**Corresponding author:** William A. Freyman, Department of Integrative Biology,  
University of California, Berkeley, CA, 94720, USA; E-mail: [freyman@berkeley.edu](mailto:freyman@berkeley.edu).

*Abstract.*— Chromosome number is a key feature of the higher-order organization of the genome, and changes in chromosome number play a fundamental role in evolution. Dysploid gains and losses in chromosome number, as well as polyploidization events, may drive reproductive isolation and lineage diversification. The recent development of probabilistic models of chromosome number evolution in the groundbreaking work by Mayrose et al. (2010, ChromEvol) have enabled the

inference of ancestral chromosome numbers over molecular phylogenies and generated new interest in studying the role of chromosome changes in evolution. However, the ChromEvol approach assumes all changes occur anagenetically (along branches), and does not model events that are specifically cladogenetic. Cladogenetic changes may be expected if chromosome changes result in reproductive isolation. Here we present a new class of models of chromosome number evolution (called ChromoSSE) that incorporate both anagenetic and cladogenetic change. The ChromoSSE models allow us to determine the mode of chromosome number evolution; is chromosome evolution occurring primarily within lineages, primarily at lineage splitting, or in clade-specific combinations of both? Furthermore, we can estimate the location and timing of possible chromosome speciation events over the phylogeny. We implemented ChromoSSE in a Bayesian statistical framework, specifically in the software RevBayes, to accommodate uncertainty in parameter estimates while leveraging the full power of likelihood based methods. We tested ChromoSSE's accuracy with simulations and re-examined chromosomal evolution in *Aristolochia*, *Carex* section *Spirostachyae*, *Helianthus*, *Mimulus* sensu lato (s.l.), and *Primula* section *Aleuritia*, finding evidence for clade-specific combinations of anagenetic and cladogenetic dysploid and polyploid modes of chromosome evolution.

(Keywords: ChromoSSE; chromosome evolution; phylogenetic models; anagenetic; cladogenetic; dysploidy; polyploidy; whole genome duplication; chromosome speciation; reversible-jump Markov chain Monte Carlo; Bayes factors )

1           A central organizing component of the higher-order architecture of the  
2 genome is chromosome number, and changes in chromosome number have long  
3 been understood to play a fundamental role in evolution. In the seminal work  
4 *Genetics and the Origin of Species* (1937), Dobzhansky identified “the raw  
5 materials for evolution”, the sources of natural variation, as two evolutionary  
6 processes: mutations and chromosome changes. “Chromosomal changes are one of  
7 the mainsprings of evolution,” Dobzhansky asserted, and changes in chromosome  
8 number such as the gain or loss of a single chromosome (dysploidy), or the  
9 doubling of the entire genome (polyploidy), can have phenotypic consequences,  
10 affect the rates of recombination, and increase reproductive isolation among  
11 lineages and thus drive diversification (Stebbins 1971). Recently, evolutionary  
12 biologists have studied the macroevolutionary consequences of chromosome changes  
13 within a molecular phylogenetic framework, mostly due to the groundbreaking  
14 work of Mayrose et al. (2010, ChromEvol) which introduced likelihood-based  
15 models of chromosome number evolution. The ChromEvol models have permitted  
16 phylogenetic studies of ancient whole genome duplication events, rapid  
17 “catastrophic” chromosome speciation, major reevaluations of the evolution of  
18 angiosperms, and new insights into the fate of polyploid lineages (e.g. Pires and  
19 Hertweck 2008; Mayrose et al. 2011; Tank et al. 2015).

20           One aspect of chromosome evolution that has not been thoroughly studied  
21 in a probabilistic framework is cladogenetic change in chromosome number.  
22 Cladogenetic changes occur solely at speciation events, as opposed to anagenetic  
23 changes that occur within lineages and are not associated with speciation events.

24 Studying cladogenetic chromosome changes in a phylogenetic framework has been  
25 difficult since the approach used by ChromEvol models only anagenetic changes  
26 and ignores the changes that occur specifically at speciation events and may be  
27 expected if chromosome changes result in reproductive isolation. Reproductive  
28 incompatibilities caused by chromosome changes may play an important role in the  
29 speciation process, and led White (1978) to propose that chromosome changes  
30 perform “the primary role in the majority of speciation events.” Indeed,  
31 chromosome fusions and fissions may have played a role in the formation of  
32 reproductive isolation and speciation in the great apes (Ayala and Coluzzi 2005),  
33 and the importance of polyploidization in plant speciation has long been  
34 appreciated (Coyne et al. 2004; Rieseberg and Willis 2007). Recent work by Zhan  
35 et al. (2016) revealed phylogenetic evidence that polyploidization is frequently  
36 cladogenetic in land plants. However, their approach did not examine the role  
37 dysploid changes may play in speciation, and it required a two step analysis in  
38 which one first used ChromEvol to infer ploidy levels, and then a second modeling  
39 step to infer the proportion of ploidy shifts that were cladogenetic. Since  
40 ChromEvol only models anagenetic polyploidization events these two modeling  
41 steps are inconsistent with one another.

42 Here we present models of chromosome number evolution that  
43 simultaneously account for both cladogenetic and anagenetic polyploid as well as  
44 dysploid changes in chromosome number over a phylogeny. These models  
45 reconstruct an explicit history of cladogenetic and anagenetic changes in a clade,  
46 enabling estimation of ancestral chromosome numbers. Our approach also identifies

47 different modes of chromosome number evolution among clades; we can detect  
48 primarily anagenetic, primarily cladogenetic, or clade-specific combinations of both  
49 modes of chromosome changes. Furthermore, these models allow us to infer the  
50 timing and location of possible polyploid and dysploid speciation events over the  
51 phylogeny. Since these models only account for changes in chromosome number,  
52 they ignore speciation that may accompany other types of chromosome  
53 rearrangements such as inversions. Our models cannot determine that changes in  
54 chromosome number “caused” the speciation event, but they do reveal that  
55 speciation and chromosome change are temporally correlated. Thus, these models  
56 can give us evidence that the chromosome number change coincided with  
57 cladogenesis and so may have played a significant role in the speciation process.

58 A major challenge for all phylogenetic models of cladogenetic character  
59 change is accounting for unobserved speciation events due to lineages going extinct  
60 and not leaving any extant descendants (Bokma 2002), or due to incomplete  
61 sampling of lineages in the present. Teasing apart the phylogenetic signal for  
62 cladogenetic and anagenetic processes given unobserved speciation events is a  
63 major difficulty. The Cladogenetic State change Speciation and Extinction  
64 (ClaSSE) model (Goldberg and Igić 2012) accounts for unobserved speciation  
65 events by jointly modeling both character evolution and the phylogenetic  
66 birth-death process. Our class of chromosome evolution models uses the ClaSSE  
67 approach, and could be considered a special case of ClaSSE. We implemented our  
68 models (called ChromoSSE) in a Bayesian framework and use Markov chain Monte  
69 Carlo algorithms to estimate posterior probabilities of the model’s parameters.

70 However, compared to most character evolution models, SSE models require  
71 additional complexity since they must model extinction and speciation processes.  
72 Using simulations, we examined the impact of this additional complexity on our  
73 chromosome evolution models' performance. Note that ChromoSSE uses the SSE  
74 approach to integrate over all unobserved speciation events and in this work we do  
75 not investigate how chromosome number affects diversification rates. Nonetheless,  
76 our implementation enables chromosome number dependent speciation and  
77 extinction rates to be estimated and this will be explored in future work.

78         Out of the class of ChromoSSE models described here, it is possible that no  
79 single model will adequately describe the chromosome evolution of a given clade.  
80 The most parameter-rich ChromoSSE model has at least 12 independent rate  
81 parameters, however the models that best describe a given dataset (a phylogeny and  
82 a set of observed chromosome counts) may be special cases of the full model. For  
83 example, there may be a clade for which the best fitting models have no anagenetic  
84 rate of polyploidization (the rate = 0.0) and for which all polyploidization events  
85 are cladogenetic. To explore the entire space of all possible models of chromosome  
86 number evolution we constructed a reversible jump Markov chain Monte Carlo  
87 (Green 1995) that samples across models of different dimensionality, drawing  
88 samples from chromosome evolution models in proportion to their posterior  
89 probability and enabling Bayes factors for each model to be calculated. This  
90 approach incorporates model uncertainty by permitting model-averaged inferences  
91 that do not condition on a single model; we draw estimates of ancestral  
92 chromosome numbers and rates of chromosome evolution from all possible models

93 weighted by their posterior probability. For general reviews of this approach to  
94 model averaging see Madigan and Raftery (1994), Hoeting et al. (1999), Kass and  
95 Raftery (1995), and for its use in phylogenetics see Posada and Buckley (2004).  
96 Averaging over all models has been shown to provide a better average predictive  
97 ability than conditioning on a single model (Madigan and Raftery 1994).  
98 Conditioning on a single model ignores model uncertainty, which can lead to an  
99 underestimation in the uncertainty of inferences made from that model (Hoeting  
100 et al. 1999). In our case, this can lead to overconfidence in estimates of ancestral  
101 chromosome numbers and chromosome evolution parameter value estimates.

102 Our motivation in developing these phylogenetic models of chromosome  
103 evolution is to determine the mode of chromosome number evolution; is  
104 chromosome evolution occurring primarily within lineages, primarily at lineage  
105 splitting, or in clade-specific combinations of both? By identifying how much of the  
106 pattern of chromosome number evolution is explained by anagenetic versus  
107 cladogenetic change, and by identifying the timing and location of possible  
108 chromosome speciation events over the phylogeny, the ChromoSSE models can help  
109 uncover how much of a role chromosome changes play in speciation. In this paper  
110 we first describe the ChromoSSE models of chromosome evolution and our  
111 Bayesian method of model selection, then we assess the models' efficacy by testing  
112 them with simulated datasets, particularly focusing on the impact of unobserved  
113 speciation events on inferences, and finally we apply the models to five empirical  
114 datasets that have been previously examined using other models of chromosome  
115 number evolution.

116

## METHODS

117

### *Models of Chromosome Evolution*

118

119

120

121

122

123

124

125

126

127

128

129

130

131

132

133

134

135

136

137

In this section we introduce our class of probabilistic models of chromosome number evolution. We are interested in modeling the changes in chromosome number both within lineages (anagenetic evolution) and at speciation events (cladogenetic evolution). The anagenetic component of the model is a continuous-time Markov process similar to Mayrose et al. (2010) as described below. The cladogenetic changes are accounted for by a birth-death process similar to Maddison et al. (2007) and Goldberg and Igić (2012), except each type of cladogenetic chromosome event is given its own rate. Thus, the birth-death process has multiple speciation rates (one for each type of cladogenetic change) and a single constant extinction rate. Our models of chromosome number evolution can therefore be understood as a specific case of the Cladogenetic State change Speciation and Extinction (ClaSSE) model (Goldberg and Igić 2012), which integrates over all possible unobserved speciation events (due to lineages that were unsampled or have gone extinct) directly in the likelihood calculation of the observed chromosome counts and tree shape. To test the importance of accounting for unobserved speciation events we also briefly describe a version of the model that handles different cladogenetic event types as transition probabilities at each observed speciation event and ignores unobserved speciation events, similar to the dispersal-extinction-cladogenesis (DEC) models of geographic range evolution (Ree and Smith 2008).



138 Our implementation assumes chromosome numbers can take the value of  
139 any positive integer, however to limit the transition matrices to a reasonable size  
140 for likelihood calculations we follow Mayrose et al. (2010) in setting the maximum  
141 chromosome number  $C_m$  to  $n + 10$ , where  $n$  is the highest chromosome number in  
142 the observed data. Note that we allow this parameter to be set in our  
143 implementation. Hence, it is easily possible to test the impact of setting a specific  
144 value for the maximum chromosome count.

145 Our models contain a set of 6 free parameters for anagenetic chromosome  
146 number evolution, a set of 5 free parameters for cladogenetic chromosome number  
147 evolution, an extinction rate parameter, and a vector of  $C_m$  root frequencies of  
148 chromosome numbers, for a total of  $12 + C_m$  free parameters. All of the 11  
149 chromosome rate parameters can be removed (fixed to 0.0) except the cladogenetic  
150 no-change rate parameter. Thus, the class of chromosome number evolution models  
151 described here has a total of  $2^{10} = 1024$  nested models of chromosome evolution.

152 *Chromosome evolution within lineages.*—

153 Chromosome number evolution within lineages (anagenetic change) is  
154 modeled as a continuous-time Markov process similar to Mayrose et al. (2010). The  
155 continuous-time Markov process is described by an instantaneous rate matrix  $Q$   
156 where the value of each element represents the instantaneous rate of change within  
157 a lineage from a genome of  $i$  chromosomes to a genome of  $j$  chromosomes. For all  
158 elements of  $Q$  in which either  $i = 0$  or  $j = 0$  we define  $Q_{ij} = 0$ . For the off-diagonal

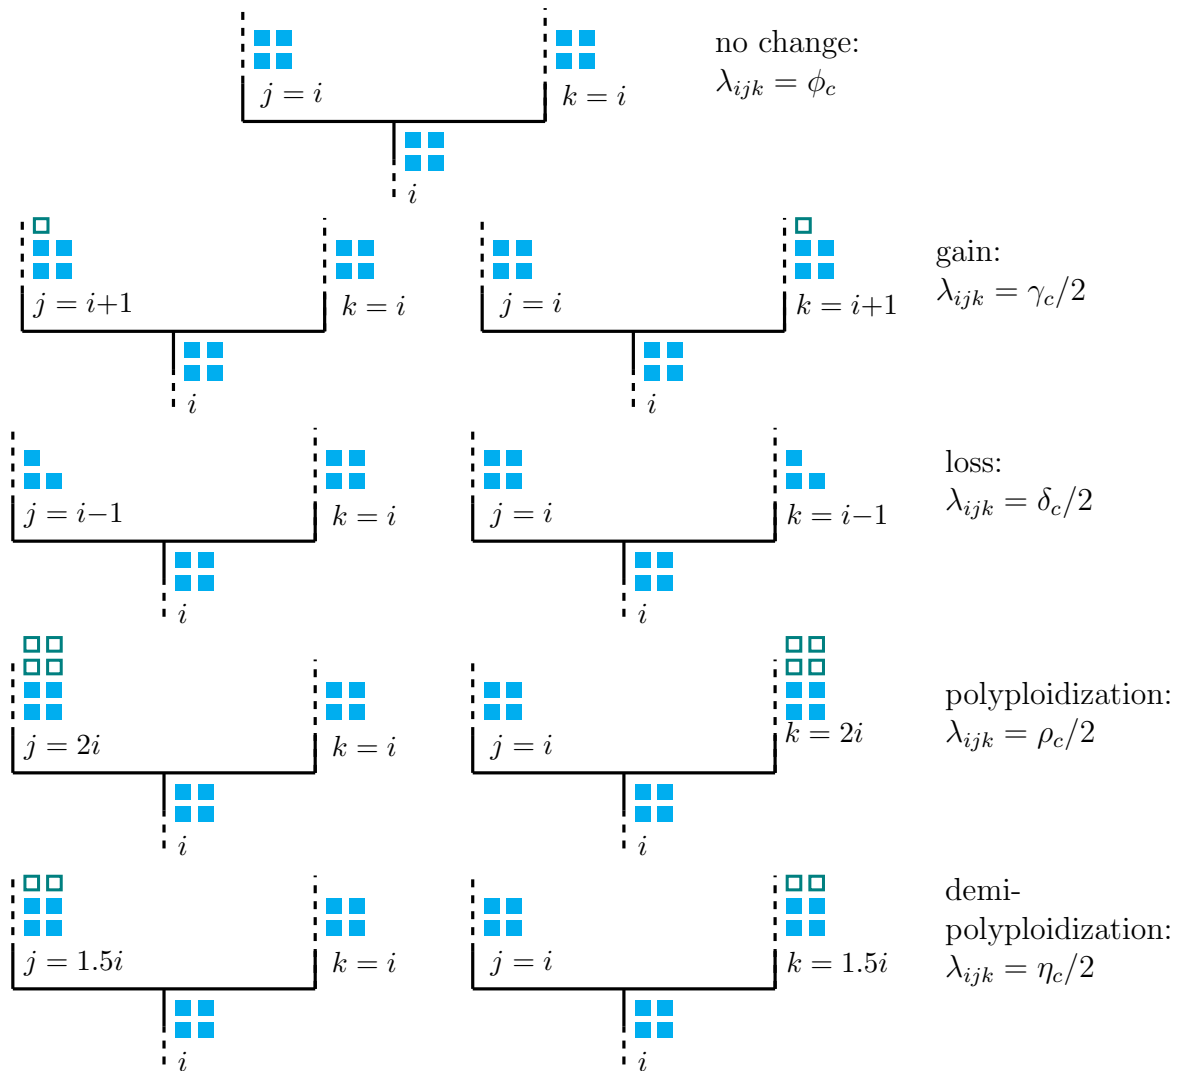

Figure 1: **Modeled cladogenetic chromosome evolution events.** At each speciation event 9 different cladogenetic events are possible. The rate of each type of speciation event is  $\lambda_{ijk}$  where  $i$  is the chromosome number before cladogenesis and  $j$  and  $k$  are the states of each daughter lineage immediately after cladogenesis. The dashed lines represent possible chromosomal changes within lineages that are modeled by the anagenetic rate matrix  $Q$ .

159 elements  $i \neq j$  with positive values of  $i$  and  $j$ ,  $Q$  is determined by:

$$Q_{ij} = \begin{cases} \gamma_a e^{\gamma_m(i-1)} & j = i + 1, \\ \delta_a e^{\delta_m(i-1)} & j = i - 1, \\ \rho_a & j = 2i, \\ \eta_a & j = 1.5i, \\ 0 & \text{otherwise,} \end{cases} \quad (1)$$

160 where  $\gamma_a$ ,  $\delta_a$ ,  $\rho_a$ , and  $\eta_a$  are the rates of chromosome gains, losses,  
161 polyploidizations, and demi-polyploidizations.  $\gamma_m$  and  $\delta_m$  are rate modifiers of  
162 chromosome gain and loss, respectively, that allow the rates of chromosome gain  
163 and loss to depend on the current number of chromosomes. This enables modeling  
164 scenarios in which the probability of fusion or fission events is positively or  
165 negatively correlated with the number of chromosomes. If the rate modifier  $\gamma_m = 0$ ,  
166 then  $\gamma_a e^{0(i-1)} = \gamma_a$ . If the rate modifier  $\gamma_m > 0$ , then  $\gamma_a e^{\gamma_m(i-1)} \geq \gamma_a$ , and if  $\gamma_m < 0$   
167 then  $\gamma_a e^{\gamma_m(i-1)} \leq \gamma_a$ . These two rate modifiers replace the parameters  $\lambda_l$  and  $\delta_l$  in  
168 Mayrose et al. (2010), which in their parameterization may result in negative  
169 transition rates. Here we chose to exponentiate  $\gamma_m$  and  $\delta_m$  to ensure positive  
170 transition rates, and avoid ad hoc restrictions on negative transition rates that may  
171 induce unintended priors. Note that this assumes the rates of chromosome change  
172 can vary exponentially as a function of the current chromosome number, whereas  
173 Mayrose et al. (2010) assumes a linear function.

174 For odd values of  $i$ , we set  $Q_{ij} = \eta/2$  for the two integer values of  $j$  resulting

175 when  $j = 1.5i$  was rounded up and down. We define the diagonal elements  $i = j$  of  
176  $Q$  as:

$$Q_{ii} = - \sum_{i \neq j}^{C_m} Q_{ij}. \quad (2)$$

177 The probability of anagenetically transitioning from chromosome number  $i$  to  $j$   
178 along a branch of length  $t$  is then calculated by exponentiation of the instantaneous  
179 rate matrix:

$$P_{ij}(t) = e^{-Qt}. \quad (3)$$

180 *Chromosome evolution at cladogenesis events.*—

181 At each lineage divergence event over the phylogeny, nine different  
182 cladogenetic changes in chromosome number are possible (Figure 1). Each type of  
183 cladogenetic event occurs with the rate  $\phi_c, \gamma_c, \delta_c, \rho_c, \eta_c$ , representing the  
184 cladogenesis rates of no change, chromosome gain, chromosome loss,  
185 polyploidization, and demi-polyploidization, respectively. The speciation rates  $\lambda$  for  
186 the birth-death process generating the tree are given in the form of a 3-dimensional  
187 matrix between the ancestral state  $i$  and the states of the two daughter lineages  $j$

188 and  $k$ . For all positive values of  $i$ ,  $j$ , and  $k$ , we define:

$$\lambda_{ijk} = \begin{cases} \phi_c & j = k = i \\ \gamma_c/2 & j = i + 1 \text{ and } k = i, \\ \gamma_c/2 & j = i \text{ and } k = i + 1, \\ \delta_c/2 & j = i - 1 \text{ and } k = i, \\ \delta_c/2 & j = i \text{ and } k = i - 1, \\ \rho_c/2 & j = 2i \text{ and } k = i, \\ \rho_c/2 & j = i \text{ and } k = 2i, \\ \eta_c/2 & j = 1.5i \text{ and } k = i, \\ \eta_c/2 & j = i \text{ and } k = 1.5i, \\ 0 & \text{otherwise,} \end{cases} \quad (4)$$

189 so that the total speciation rate of the birth-death process  $\lambda_t$  is given by:

$$\lambda_t = \phi_c + \gamma_c + \delta_c + \rho_c + \eta_c. \quad (5)$$

190 Similar to the anagenetic instantaneous rate matrix described above, for odd values  
 191 of  $i$ , we set  $\lambda_{ijk} = \eta_c/4$  for the integer values of  $j$  and  $k$  resulting when  $1.5i$  is  
 192 rounded up and down. The extinction rate  $\mu$  is constant over the tree and for all  
 193 chromosome numbers.

194 Note that this model allows only a single chromosome number change event

195 on a maximum of one of the daughter lineages at each cladogenesis event. Changes  
196 in both daughter lineages at cladogenesis are not allowed; at least one of the  
197 daughter lineages must inherit the chromosome number of the ancestor. The model  
198 also assumes that cladogenesis events are always strictly bifurcating and that there  
199 are no hard polytomies.

200 *Likelihood Calculation Accounting for Unobserved Speciation.*—

201 The likelihood of cladogenetic and anagenetic chromosome number evolution  
202 over a phylogeny is calculated using a set of ordinary differential equations similar  
203 to the Binary State Speciation and Extinction (BiSSE) model (Maddison et al.  
204 2007). The BiSSE model was extended to incorporate cladogenetic changes by  
205 Goldberg and Igić (2012). Following Goldberg and Igić (2012), we define  $D_{Ni}(t)$  as  
206 the probability that a lineage with chromosome number  $i$  at time  $t$  evolves into the  
207 observed clade  $N$ . We let  $E_i(t)$  be the probability that a lineage with chromosome  
208 number  $i$  at time  $t$  goes extinct before the present, or is not sampled at the present.  
209 However, unlike the full ClaSSE model the extinction rate  $\mu$  does not depend on  
210 the chromosome number  $i$  of the lineage. The differential equations for these two  
211 probabilities is given by:

212

$$\frac{dD_{Ni}(t)}{dt} = - \left( \sum_{j=1}^{C_m} \sum_{k=1}^{C_m} \lambda_{ijk} + \sum_{j=1}^{C_m} Q_{ij} + \mu \right) D_{Ni}(t)$$

213

$$+ \sum_{j=1}^{C_m} Q_{ij} D_{Nj}(t) + \sum_{j=1}^{C_m} \sum_{k=1}^{C_m} \lambda_{ijk} \left( D_{Nk}(t) E_j(t) + D_{Nj}(t) E_k(t) \right) \quad (6)$$

214

215

216

217

$$\begin{aligned} \frac{dE_i(t)}{dt} = & - \left( \sum_{j=1}^{C_m} \sum_{k=1}^{C_m} \lambda_{ijk} + \sum_{j=1}^{C_m} Q_{ij} + \mu \right) E_i(t) \\ & + \mu + \sum_{j=1}^{C_m} Q_{ij} E_j(t) + \sum_{j=1}^{C_m} \sum_{k=1}^{C_m} \lambda_{ijk} E_j(t) E_k(t), \quad (7) \end{aligned}$$

219

220

221 where  $\lambda_{ijk}$  for each possible cladogenetic event is given by equation 4, and the rates  
222 of anagenetic changes  $Q_{ij}$  are given by equation 1. See Figure 2 for an explanation  
223 of equations 6 and 7.

224 The differential equations above have no known analytical solution.

225 Therefore, we numerically integrate the equations for every arbitrarily small time  
226 interval moving along each branch from the tip of the tree towards the root. When  
227 a node  $l$  is reached, the probability of it being in state  $i$  is calculated by combining  
228 the probabilities of its descendant nodes  $m$  and  $n$  as such:

$$D_{li}(t) = \sum_{j=1}^{C_m} \sum_{k=1}^{C_m} \lambda_{ijk} D_{mj}(t) D_{nk}(t), \quad (8)$$

229 where again  $\lambda_{ijk}$  for each possible cladogenetic event is given by equation 4. Letting  
230  $D$  denote a set of observed chromosome counts,  $\Psi$  an observed phylogeny, and  $\theta_q$  a  
231 particular set of chromosome evolution model parameters, then the likelihood for  
232 the model parameters  $\theta_q$  is given by:

$$P(D, \Psi | \theta_q) = \sum_{i=1}^{C_m} \pi_i D_{0i}(t), \quad (9)$$

233 where  $\pi_i$  is the root frequency of chromosome number  $i$  and  $D_{0i}(t)$  is the likelihood  
234 of the root node being in state  $i$  conditional on having given rise to the observed  
235 tree  $\Psi$  and the observed chromosome counts  $D$ .



a

$$\frac{dD_{N_i}(t)}{dt} = -\left(\sum_j \sum_k \lambda_{ijk} + \sum_j Q_{ij} + \mu\right) D_{N_i}(t) + \sum_j Q_{ij} D_{N_j}(t) + \sum_j \sum_k \lambda_{ijk} \left( D_{N_i}(t) E_j(t) + D_{N_j}(t) E_i(t) \right)$$

no event occurred                      anagenetic change                      speciation followed by extinction w/  
possible cladogenetic change

b

$$\frac{dE_i(t)}{dt} = -\left(\sum_j \sum_k \lambda_{ijk} + \sum_j Q_{ij} + \mu\right) E_i(t) + \mu + \sum_j Q_{ij} E_j(t) + \sum_j \sum_k \lambda_{ijk} E_j(t) E_k(t)$$

no event followed by extinction                      extinction                      anagenetic change followed by extinction                      speciation followed by extinction w/  
possible cladogenetic change

Figure 2: **Chromosome evolution through time.** An illustration of chromosome evolution events that could occur during each time interval  $\Delta t$  along the branches of a phylogeny. Equations 6 and 7 (subfigures a and b, respectively) sum over each possible chromosome evolution event and are numerically integrated backwards through time over the phylogeny to calculate the likelihood. a)  $D_{N_i}(t)$  is the probability that the lineage at time  $t$  evolves into the observed clade  $N$ . To calculate the change in this probability over  $\Delta t$  we sum over three possibilities: no event occurred, an anagenetic change in chromosome number occurred, or a speciation event with a possible cladogenetic chromosome change occurred followed by an extinction event on one of the two daughter lineages. b)  $E_i(t)$  is the probability that the lineage goes extinct or is not sampled at the present. To calculate the change in this probability over  $\Delta t$  we sum over four possibilities: no event occurred followed eventually by extinction, extinction occurred, an anagenetic change occurred followed by extinction, or a speciation event with a possible cladogenetic change occurred followed by extinction of both daughter lineages.

236 *Initial Conditions.*—

237 The initial conditions for each observed lineage at time  $t = 0$  for the  
238 extinction probabilities described by equation 7 are  $E_i(0) = 1 - \rho_s$  for all  $i$  where  $\rho_s$   
239 is the sampling probability of including that lineage. For lineages with an observed  
240 chromosome number of  $i$ , the initial condition is  $D_{Ni}(0) = \rho_s$ . The initial condition  
241 for all other chromosome numbers  $j$  is  $D_{Nj}(0) = 0$ .

242 *Likelihood Calculation Ignoring Unobserved Speciation.*—

243 To test the effect of unobserved speciation events on inferences of  
244 chromosome number evolution we also implemented a version of the model  
245 described above that only accounts for observed speciation events. At each lineage  
246 divergence event over the phylogeny, the probabilities of cladogenetic chromosome  
247 number evolution  $P(\{j, k\}|i)$  are given by the simplex  $\{\phi_p, \gamma_p, \delta_p, \rho_p, \eta_p\}$ , where  
248  $\phi_p, \gamma_p, \delta_p, \rho_p$ , and  $\eta_p$  represent the probabilities of no change, chromosome gain,  
249 chromosome loss, polyploidization, and demi-polyploidization, respectively. This  
250 approach does not require estimating speciation or extinction rates.

251 Here, we calculate the likelihood of chromosome number evolution over a  
252 phylogeny using Felsenstein's pruning algorithm (Felsenstein 1981) modified to  
253 include cladogenetic probabilities similar to models of biogeographic range  
254 evolution (Landis et al. 2013; Landis in press). Let  $D$  again denote a set of  
255 observed chromosome counts and  $\Psi$  represent an observed phylogeny where node  $l$   
256 has descendant nodes  $m$  and  $n$ . The likelihood of chromosome number evolution at  
257 node  $l$  conditional on node  $l$  being in state  $i$  and  $\theta_q$  being a particular set of

258 chromosome evolution model parameter values is given by:

259

260  $P_l(D, \Psi|i, \theta_q) =$

$$261 \underbrace{\sum_{j=1}^{C_m} \sum_{k=1}^{C_m} P(\{j, k\}|i)}_{\text{cladogenetic}} \left[ \underbrace{\sum_{j_e=1}^{C_m} P_{jj_e}(t_m) P_m(D, \Psi|j_e, \theta_q)}_{\text{anagenetic}} \left[ \sum_{k_e=1}^{C_m} P_{kk_e}(t_n) P_n(D, \Psi|k_e, \theta_q) \right] \right],$$

262 (10)

263 where the length of the branches between  $l$  and  $m$  is  $t_m$  and between  $l$  and  $n$  is  $t_n$ .

264 The state at the end of these branches near nodes  $m$  and  $n$  is  $j_e$  and  $k_e$ ,

265 respectively. The state at the beginning of these branches, where they meet at node

266  $l$ , is  $j$  and  $k$  respectively. The cladogenetic term sums over the probabilities

267  $P(\{j, k\}|i)$  of all possible cladogenetic changes from state  $i$  to the states  $j$  and  $k$  at

268 the beginning of each daughter lineage. The anagenetic term of the equation is the

269 product of the probability of changes along the branches from state  $j$  to state  $j_e$

270 and state  $k$  to state  $k_e$  (given by equation 3) and the likelihood of the tree above

271 node  $l$  recursively computed from the tips.

272 The likelihood for the model parameters  $\theta_q$  is given by:

$$P(D, \Psi|\theta_q) = \sum_{i=1}^{C_m} \pi_i P_0(D, \Psi|i, \theta_q), \quad (11)$$

273 where  $P_0(D, \Psi|i, \theta_q)$  is the conditional likelihood of the root node being in state  $i$

274 and  $\pi_i$  is the root frequency of chromosome number  $i$ .

275 *Estimating Parameter Values and Ancestral States.*—

276 For any given tree with a set of observed chromosome counts, there exists a  
277 posterior distribution of model parameter values and a set of probabilities for the  
278 ancestral chromosome numbers at each internal node of the tree. Let  $P(s_i, \theta_q | D, \Psi)$   
279 denote the joint posterior probability of  $\theta_q$  and a vector of specific ancestral  
280 chromosome numbers  $s_i$  given a set of observed chromosome counts  $D$  and an  
281 observed tree  $\Psi$ . The posterior is given by Bayes' rule:

$$P(s_i, \theta_q, | D, \Psi) = \frac{P(D, \Psi | s_i, \theta_q) P(s_i | \theta_q) P(\theta_q)}{\int_{\theta} \sum_{s=1}^{C_m} P(D, \Psi | s, \theta) P(s | \theta) P(\theta) d\theta}. \quad (12)$$

282 Here,  $P(s_i | \theta_q)$  is the prior probability of the ancestral states  $s$  conditioned on the  
283 model parameters  $\theta_q$ , and  $P(\theta_q)$  is the joint prior probability of the model  
284 parameters.

285 In the denominator of equation 12 we integrate over all possible values of  $\theta$   
286 and sum over all possible ancestral chromosome numbers  $s$ . Since  $\theta$  is a vector of  
287  $12 + C_m$  parameters and  $s$  is a vector of  $n - 1$  ancestral states where  $n$  is the  
288 number of observed tips in the phylogeny, the denominator of equation 12 requires  
289 a high dimensional integral and an extremely large summation that is impossible to  
290 calculate analytically. Instead we use Markov chain Monte Carlo methods  
291 (Metropolis et al. 1953; Hastings 1970) to estimate the posterior probability  
292 distribution in a computationally efficient manner.

293 Ancestral states are inferred using a two-pass tree traversal procedure as  
294 described in Pupko et al. (2000), and previously implemented in a Bayesian  
295 framework by Huelsenbeck and Bollback (2001) and Pagel et al. (2004). First,

296 partial likelihoods are calculated during the backwards-time post-order tree  
297 traversal in equations 6 and 7. Joint ancestral states are then sampled during a  
298 pre-order tree traversal in which the root state is first drawn from the marginal  
299 likelihoods at the root, and then states are drawn for each descendant node  
300 conditioned on the state at the parent node until the tips are reached. Again, we  
301 must numerically integrate over a system of differential equations during this  
302 root-to-tip tree traversal. This integration, however, is performed in forward-time,  
303 thus the set of ordinary differential equations must be slightly altered since our  
304 models of chromosome number evolution are not time reversible. Accordingly, we  
305 calculate:

$$\begin{aligned} \frac{dD_{Ni}(t)}{dt} = & - \left( \sum_{j=1}^{C_m} \sum_{k=1}^{C_m} \lambda_{ijk} + \sum_{j=1}^{C_m} Q_{ji} + \mu \right) D_{Ni}(t) \\ & + \sum_{j=1}^{C_m} Q_{ji} D_{Nj}(t) + \sum_{j=1}^{C_m} \sum_{k=1}^{C_m} \lambda_{ijk} \left( D_{Nj}(t) E_k(t) + D_{Nk}(t) E_j(t) \right) \end{aligned} \quad (13)$$

$$\begin{aligned} \frac{dE_i(t)}{dt} = & \left( \sum_{j=1}^{C_m} \sum_{k=1}^{C_m} \lambda_{ijk} + \sum_{j=1}^{C_m} Q_{ji} + \mu \right) E_i(t) \\ & - \mu - \sum_{j=1}^{C_m} Q_{ji} E_j(t) - \sum_{j=1}^{C_m} \sum_{k=1}^{C_m} \lambda_{ijk} E_j(t) E_k(t), \end{aligned} \quad (14)$$

315 during the forward-time root-to-tip pass to draw ancestral states from their joint  
316 distribution conditioned on the model parameters and observed chromosome  
317 counts. For more details and validation of our method to estimate ancestral states,

318 please see Supplementary Material Appendix 1.

319 *Priors.*—

320 Model parameter priors are listed in Table 1. Our implementation allows all  
321 priors to be easily modified so that their impact on results can be effectively  
322 assessed. Priors for anagenetic rate parameters are given an exponential  
323 distribution with a mean of  $2/\Psi_l$  where  $\Psi_l$  is the length of the tree  $\Psi$ . This  
324 corresponds to a mean rate of two events over the observed tree. The priors for the  
325 rate modifiers  $\gamma_m$  and  $\delta_m$  are assigned a uniform distribution with the range  
326  $-3/C_M$  to  $3/C_m$ . This sets minimum and maximum bounds on the amount the  
327 rate modifiers can affect the rates of gain and loss at the maximum chromosome  
328 number to  $\gamma_a e^{-3} = \gamma_a 0.050$  and  $\gamma_a e^3 = \gamma_a 20.1$ , and  $\delta_a e^{-3} = \delta_a 0.050$  and  
329  $\delta_a e^3 = \delta_a 20.1$ , respectively.

330 The speciation rates are drawn from an exponential prior with a mean equal  
331 to an estimate of the net diversification rate  $\hat{d}$ . Under a constant rate birth-death  
332 process not conditioning on survival of the process, the expected number of lineages  
333 at time  $t$  is given by:

$$E(N_t) = N_0 e^{td}, \quad (15)$$

334 where  $N_0$  is the number of lineages at time 0 and  $d$  is the net diversification rate  
335  $\lambda - \mu$  (Nee et al. 1994; Höhna 2015). Therefore, we estimate  $\hat{d}$  as:

$$\hat{d} = (\ln N_t - \ln N_0)/t, \quad (16)$$

336 where  $N_t$  is the number of lineages in the observed tree that survived to the

337 present,  $t$  is the age of the root, and  $N_0 = 2$ .

338 The extinction rate  $\mu$  is given by:

$$\mu = r \times \lambda_t = r \times (\phi_c + \gamma_c + \delta_c + \rho_c + \eta_c), \quad (17)$$

339 where  $\lambda_t$  is the total speciation rate and  $r$  is the relative extinction rate. The  
 340 relative extinction rate  $r$  is assigned a uniform  $(0,1)$  prior distribution, thus forcing  
 341 the extinction rate to be smaller than the total speciation rate. The root  
 342 frequencies of chromosome numbers  $\pi$  are drawn from a flat Dirichlet distribution.

Table 1: **Model parameter names and prior distributions.** See the main text for complete description of model parameters and prior distributions.  $\Psi_l$  represents the length of tree  $\Psi$  and  $C_m$  is the maximum chromosome number allowed.

|              | Parameter                                | $X$        | $f(X)$                               |
|--------------|------------------------------------------|------------|--------------------------------------|
| Anagenetic   | Chromosome gain rate                     | $\gamma_a$ | Exponential( $\lambda = \Psi_l/2$ )  |
|              | Chromosome loss rate                     | $\delta_a$ | Exponential( $\lambda = \Psi_l/2$ )  |
|              | Polyploidization rate                    | $\rho_a$   | Exponential( $\lambda = \Psi_l/2$ )  |
|              | Demi-polyploidization rate               | $\eta_a$   | Exponential( $\lambda = \Psi_l/2$ )  |
|              | Linear component of chromosome gain rate | $\gamma_m$ | Uniform( $-3/C_m, 3/C_m$ )           |
|              | Linear component of chromosome loss rate | $\delta_m$ | Uniform( $-3/C_m, 3/C_m$ )           |
| Cladogenetic | No change                                | $\phi_c$   | Exponential( $\lambda = 1/\hat{d}$ ) |
|              | Chromosome gain                          | $\gamma_c$ | Exponential( $\lambda = 1/\hat{d}$ ) |
|              | Chromosome loss                          | $\delta_c$ | Exponential( $\lambda = 1/\hat{d}$ ) |
|              | Polyploidization                         | $\rho_c$   | Exponential( $\lambda = 1/\hat{d}$ ) |
|              | Demi-polyploidization                    | $\eta_c$   | Exponential( $\lambda = 1/\hat{d}$ ) |
| Other        | Root frequencies                         | $\pi$      | Dirichlet( $1, \dots, 1$ )           |
|              | Relative-extinction                      | $r$        | Uniform( $0, 1$ )                    |

343 *Model Uncertainty and Selection*

344 *Model Averaging.*—

345 To account for model uncertainty we calculate the posterior density of  
346 chromosome evolution model parameters  $\theta$  without conditioning on any single  
347 model of chromosome evolution. For each of the 1024 chromosome models  $M_k$ ,  
348 where  $k = 1, 2, \dots, 1024$ , the posterior distribution of  $\theta$  is

$$P(\theta|D) = \sum_{k=1}^K P(\theta|D, M_k)P(M_k|D). \quad (18)$$

349 Here we average over the posterior distributions conditioned on each model  
350 weighted by the model's posterior probability. We assume an equal prior  
351 probability for each model  $P(M_k) = 2^{-10}$ .

352 *Reversible Jump Markov Chain Monte Carlo.*—

353 To sample from the space of all possible chromosome evolution models, we  
354 employ reversible jump MCMC (Green 1995). This algorithm draws samples from  
355 parameter spaces of differing dimensions, and in stationarity samples each model in  
356 proportion to its posterior probability. This permits inference of each model's fit to  
357 the data while simultaneously accounting for model uncertainty.

358 Our reversible jump MCMC moves between models of different dimensions  
359 using augment and reduce moves (Huelsenbeck et al. 2000; Pagel and Meade 2006;  
360 May et al. 2016). The reduce move proposes that a parameter should be removed  
361 from the current model by setting its value to 0.0, effectively disallowing that class  
362 of evolutionary event. Augment moves reverse reduce moves by allowing the  
363 parameter to once again have a non-zero value. Both augment and reduce moves  
364 operate on all chromosome rate parameters except for  $\phi_c$  the rate of no



365 cladogenetic change. Thus the least complex model the MCMC can sample from is  
366 one in which  $\phi_c > 0.0$  and all other chromosome rate parameters are set to 0.0,  
367 corresponding to a model of no chromosomal changes over the phylogeny. The prior  
368 probability of reducing or augmenting model  $M_k$  is  $P_r(M_k) = P_a(M_k) = 0.5$ .

369 *Bayes Factors.*—

370 In some cases we wish to compare the fit of models to summarize the mode  
371 of evolution within a clade. Bayes factors (Kass and Raftery 1995) compare the  
372 evidence between two competing models  $M_i$  and  $M_j$

$$B_{ij} = \frac{P(D|M_i)}{P(D|M_j)} = \frac{P(M_i|D)}{P(M_j|D)} / \frac{P(M_i)}{P(M_j)}. \quad (19)$$

373 In words, the Bayes factor  $B_{ij}$  is given by the ratio of the posterior odds to the  
374 prior odds of the two models. Unlike other methods of model selection such as  
375 Akaike Information Criterion (AIC; Akaike 1974) and the Bayesian Information  
376 Criterion (BIC; Schwarz 1978), Bayes factors take into account the full posterior  
377 densities of the model parameters and do not rely on point estimates. Furthermore  
378 AIC and BIC ignore the priors assigned to parameters, whereas Bayes factors  
379 penalizes parameters based on the informativeness of the prior. If the prior is  
380 informative but overlaps little with the likelihood it is penalized more than a  
381 diffuse uninformative prior that allows the parameter to take on whatever value is  
382 informed by the data (Xie et al. 2011).

383

### *Implementation*

384 The model and MCMC analyses described here are implemented in C++ in  
385 the software RevBayes (Höhna et al. 2016). In Supplementary Material Appendix 1  
386 we validated our SSE likelihood calculations and ancestral state estimates against  
387 those of the R package diversitree (FitzJohn 2012). Rev scripts that specify the  
388 chromosome number evolution model (ChromoSSE) described here as a  
389 probabilistic graphical model (Höhna et al. 2014) and run the empirical analyses in  
390 RevBayes are available at <http://github.com/wf8/ChromoSSE>. The RevGadgets  
391 R package (available at <https://github.com/revbayes/RevGadgets>) contains  
392 functions to summarize results and generate plots of inferred ancestral chromosome  
393 numbers over a phylogeny.

394 The MCMC proposals used are outlined in Supplementary Material  
395 Appendix 2. Aside from the reversible jump MCMC proposals described above, all  
396 other proposals are standard except for the ElementSwapSimplex move operated on  
397 the Dirichlet distributed root frequencies parameter. This move randomly selects  
398 two elements  $r_1$  and  $r_2$  from the root frequencies vector and swaps their values.  
399 The reverse move, swapping the original values of  $r_1$  and  $r_2$  back, will have the  
400 same probability as the initial move since  $r_1$  and  $r_2$  were drawn from a uniform  
401 distribution. Thus, the Hasting ratio is 1 and the ElementSwapSimplex move is a  
402 symmetric Metropolis move.

### 403 *Simulations*

404 We conducted a series of simulations to: 1) test the effect of unobserved  
405 speciation events due to extinction on chromosome number estimates when using a

406 model that does not account for unobserved speciation, 2) compare the accuracy of  
407 models of chromosome evolution that account for unobserved speciation versus  
408 those that do not, 3) test the effect of jointly estimating speciation and extinction  
409 rates with chromosome number evolution, 4) test for identifiability of cladogenetic  
410 parameters, and 5) test the effect of incomplete sampling of extant lineages on  
411 ancestral chromosome number estimates. We will refer to each of the 5 simulations  
412 above as experiment 1, experiment 2, experiment 3, experiment 4, and experiment  
413 5. Detailed descriptions of each experiment and the methods used to simulate trees  
414 and chromosome counts are in Supplementary Material Appendix 3.

415 For all 5 experiments, MCMC analyses were run for 5000 iterations, where  
416 each iteration consisted of 28 different moves in a random move schedule with 79  
417 moves per iteration (see Supplementary material Appendix 2). Samples were drawn  
418 with each iteration, and the first 1000 samples were discarded as burn in. Effective  
419 sample sizes (ESS) for all parameters in all simulation replicates were over 200, and  
420 the mean ESS values of the posterior for the replicates was 1470.3. See  
421 Supplementary Material Appendix 4 for more on convergence of simulation  
422 replicates. To perform all 5 experiments 2100 independent MCMC analyses were  
423 run requiring a total of 89170.6 CPU hours on the Savio computational cluster at  
424 the University of California, Berkeley.

425 *Summarizing Simulation Results.*—

426 To summarize the results of our simulations, we measured the accuracy of  
427 ancestral state estimates as the percent of simulation replicates in which the true  
428 root chromosome number 8 was found to be the maximum a posteriori (MAP)

429 estimate. To evaluate the uncertainty of the simulations, we calculated the mean  
430 posterior probability of root chromosome number for the simulation replicates that  
431 correctly found 8 to be the MAP estimate. We also calculated the proportion of  
432 simulation replicates for which the true model of chromosome number evolution  
433 used to simulate the data (as given by the table in Supplementary Material  
434 Appendix 3) was estimated to be the MAP model, and calculated the mean  
435 posterior probabilities of the true model. To compare the accuracy of model  
436 averaged parameter value estimates we calculated coverage probabilities. Coverage  
437 probabilities are the percentage of simulation replicates for which the true  
438 parameter value falls within the 95% highest posterior density (HPD). High  
439 accuracy is shown when coverage probabilities approach 1.0.

#### 440 *Empirical Data*

441 Phylogenetic data and chromosomes counts from five plant genera were  
442 analyzed (see Table 2). Like in Mayrose et al. (2010) we assumed each species had  
443 a single cytotype, however polymorphism could be accounted for by a vector of  
444 probabilities for each chromosome count. Sequence data for *Aristolochia* was  
445 downloaded from TreeBASE (Vos et al. 2010) study ID 1586. Sequences for  
446 *Helianthus*, *Mimulus* sensu lato, and *Primula* were downloaded directly from  
447 GenBank (Benson et al. 2005), reconstructing the sequence matrices from Timme  
448 et al. (2007), Beardsley et al. (2004), and Guggisberg et al. (2009). For each of  
449 these four datasets phylogenetic analyses were performed with all gene regions  
450 concatenated and unpartitioned, assuming the general time-reversible (GTR)

451 nucleotide substitution model (Tavaré 1986; Rodriguez et al. 1990) with among-site  
452 rate variation modeled using a discretized gamma distribution (Yang 1994) with  
453 four rate categories. Since divergence time estimation in years is not the objective  
454 of this study, and only relative branching times are needed for our models of  
455 chromosome number evolution, a birth-death tree prior was used with a fixed root  
456 age of 10.0 time units. The MCMC analyses were performed in RevBayes, and were  
457 sampled every 100 iterations and run for a total of 400000 iterations, with samples  
458 from the first 100000 iterations discarded as burnin. Convergence was assessed by  
459 ensuring that the effective sample size for all parameters was over 200. The  
460 maximum a posteriori tree was calculated and used for further chromosome  
461 evolution analyses. For *Carex* section *Spirostachyae* the time calibrated tree from  
462 Escudero et al. (2010) was used.

463 Ancestral chromosome numbers and chromosome evolution model  
464 parameters were then estimated for each of the five clades. Since testing the effect  
465 of incomplete taxon sampling on chromosome evolution inference of the empirical  
466 datasets was not a goal of this work, we focus here on results using a taxon  
467 sampling fraction  $\rho_s$  of 1.0 (though see the Discussion section for more on this).  
468 MCMC analyses were run in RevBayes for 11000 iterations, where each iteration  
469 consisted of 28 different Metropolis-Hastings moves in a random move schedule  
470 with 79 moves per iteration (see Supplementary Material Appendix 2). Samples  
471 were drawn each iteration, and the first 1000 samples were discarded as burn in.  
472 Effective sample sizes for all parameters were over 200. For all datasets except  
473 *Primula* we used priors as outlined in Table 1. To demonstrate the flexibility of our

Table 2: **Empirical data sets analysed.**

| Clade                                     | Study                    | Gene region                                                                                   | Alignment length (bp)      | Number of OTUs | Haploid chromosome numbers range |
|-------------------------------------------|--------------------------|-----------------------------------------------------------------------------------------------|----------------------------|----------------|----------------------------------|
| <i>Aristolochia</i>                       | Ohi-Toma et al. (2006)   | matK                                                                                          | 1268                       | 34             | 3 - 16                           |
| <i>Carex</i> section <i>Spirostachyae</i> | Escudero et al. (2010)   | ITS, trnK intron                                                                              | see Escudero et al. (2010) | 24             | 30 - 42                          |
| <i>Helianthus</i>                         | Timme et al. (2007)      | ETS                                                                                           | 3085                       | 102            | 17 - 51                          |
| <i>Mimulus</i> sensu lato                 | Beardsley et al. (2004)  | trnL intron, ETS, ITS                                                                         | 2210                       | 115            | 8 - 46                           |
| <i>Primula</i> section <i>Aleuritia</i>   | Guggisberg et al. (2009) | rpl16 intron, rps16 intron, trnL intron, trnL-trnF spacer, trnT-trnL spacer, trnD-trnT region | 5705                       | 56             | 9 - 36                           |

474 Bayesian implementation and its capacity to incorporate prior information we used  
475 an informative prior for the root chromosome number in the *Primula* section  
476 *Aleuritia* analysis. Our dataset for *Primula* section *Aleuritia* also included samples  
477 from *Primula* sections *Armerina* and *Sikkimensis*. Since we were most interested in  
478 estimating chromosome evolution within section *Aleuritia*, we used an informative  
479 Dirichlet prior  $\{1, \dots, 1, 100, 1, \dots, 1\}$  (with 100 on the 11th element) to bias the root  
480 state towards the reported base number of *Primula*  $x = 11$  (Conti et al. 2000).  
481 Note all priors can be easily modified in our implementation, thus the impact of  
482 priors can be efficiently tested.

483

## RESULTS

484

### *Simulations*

485 *General Results.*—

486 In all simulations, the true model of chromosome number evolution was  
487 infrequently estimated to be the MAP model ( $< 36\%$  of replicates), and when it  
488 was the posterior probability of the MAP model was very low ( $< 0.12$ ; Table 3).  
489 We found that the accuracy of root chromosome number estimation was similar  
490 whether the process that generated the simulated data was cladogenetic-only or  
491 anagenetic-only (Tables 3 and 4). However, when the data was simulated under a  
492 process that included both cladogenetic and anagenetic evolution we found a  
493 decrease in accuracy in the root chromosome number estimates in all cases.

494 *Experiment 1 Results.*—

495 The presence of unobserved speciation in the process that generated the  
496 simulated data decreased the accuracy of ancestral state estimates (Figure 3, Table  
497 3). Similarly, uncertainty in root chromosome number estimates increased with  
498 unobserved speciation (lower mean posterior probabilities; Table 3). The accuracy  
499 of parameter value estimates as measured by coverage probabilities was similar  
500 (results not shown).

501 *Experiment 2 Results.*—

502           When comparing estimates from ChromoSSE that account for unobserved  
503   speciation to estimates from the non-SSE model that does not account for  
504   unobserved speciation, we found that the accuracy in estimating model parameter  
505   values was mostly similar, though for some cladogenetic parameters there was  
506   higher accuracy with the model that did account for unobserved speciation  
507   (ChromoSSE; Figure 4). For both models estimates of anagenetic parameters were  
508   more accurate than estimates of cladogenetic parameters when the true generating  
509   model included cladogenetic changes.

510           We found that ChromoSSE had more uncertainty in root chromosome  
511   number estimates (lower mean posterior probabilities) compared to the non-SSE  
512   model that did not account for unobserved speciation. Similarly, the root  
513   chromosome number was estimated with slightly lower accuracy (Table 4).

514   *Experiment 3 Results.*—

515           We found that jointly estimating speciation and extinction rates with  
516   chromosome number evolution using ChromoSSE slightly decreased the accuracy of  
517   root chromosome number estimates, and further it increased the uncertainty of the  
518   inferred root chromosome number (as reflected in lower mean posterior  
519   probabilities; Table 4). Fixing the speciation and extinction rates to their true  
520   value removed much of the increased uncertainty associated with using a model  
521   that accounts for unobserved speciation (Table 4).

522   *Experiment 4 Results.*—

523           Under simulation scenarios that had cladogenetic changes but no anagenetic



524 changes, we found that ChromoSSE overestimated anagenetic parameters and  
525 underestimated cladogenetic parameters (Figure 5 A), which explains the lower  
526 coverage probabilities of cladogenetic parameters reported above for experiment 2  
527 (Figure 4). When anagenetic parameters were fixed to 0.0 cladogenetic parameters  
528 were no longer underestimated (Figure 5 A), and the coverage probabilities of  
529 cladogenetic parameters increased slightly (Figure 5 B).

530 *Experiment 5 Results.*—

531 We found that incomplete sampling of extant lineages had a minor effect on  
532 the accuracy of ancestral chromosome number estimates (Figure 6). Accuracy only  
533 slightly decreased as the percentage of extant lineages sampled declined from 100%  
534 to 50%, and decreased more rapidly when the percentage went to 10%. As  
535 measured by the proportion of simulation replicates that inferred the MAP root  
536 chromosome number to be the true root chromosome number, the accuracy of  
537 ancestral states estimated under ChromoSSE declined from 0.80 accuracy at 100%  
538 taxon sampling to 0.69 at 10% taxon sampling. Essentially no difference in  
539 accuracy was detected between the non-SSE model that does not take unobserved  
540 speciation into account and ChromoSSE. Furthermore, little difference in accuracy  
541 was detected using ChromoSSE with the taxon sampling probability  $\rho_s$  set to 1.0  
542 compared to ChromoSSE with  $\rho_s$  set to the true value (0.1, 0.5, or 1.0; Figure 6).

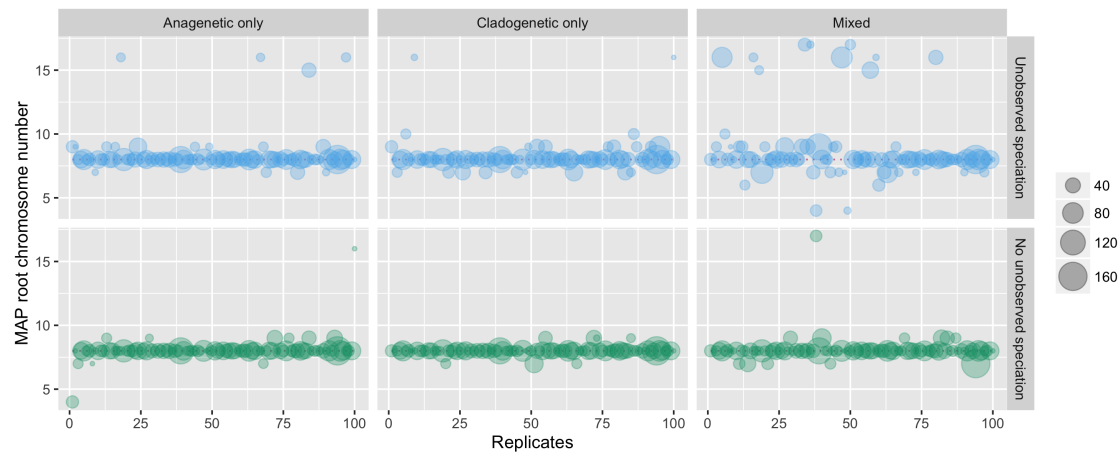

Figure 3: **Experiment 1 results: the effect of unobserved speciation events on the maximum a posteriori (MAP) estimates of root chromosome number.** Model averaged MAP estimates of the root chromosome number for 100 replicates of each simulation type on datasets that included unobserved speciation and datasets that did not include unobserved speciation. Each circle represents a simulation replicate, where the size of the circle is proportional to the number of lineages that survived to the present (the number of extant tips in the tree). The true root chromosome number used to simulate the data was 8 and is marked with a pink dotted line.

**Table 3: Experiment 1 results: the effect of ignoring unobserved speciation events on chromosome evolution estimates.** Regardless of the true mode of chromosome evolution, the presence of unobserved speciation events in the process that generated the simulated data decreased accuracy in estimating the true root state. The columns from left to right are: 1) an indication of whether or not the data was simulated with a process that included unobserved speciation, 2) the true mode of chromosome evolution used to simulate the data, (for description see main text and Supplementary Material Appendix 3), 3) the percent of simulation replicates in which the true chromosome number at the root used to simulate the data was found to be the maximum a posteriori (MAP) estimate, 4) the mean posterior probability of the MAP estimate of the true root chromosome number, 5) the percent of simulation replicates in which the true model used to simulate the data was also found to be the MAP model, and 6) the mean posterior probability of the MAP estimate of the true model.

| Unobserved Speciation Events Included When Simulating Data? | Mode of Evolution Used to Simulate Data | True Root State Estimated (%) | Mean Posterior of True Root State | True Model Estimated (%) | Mean Posterior of True Model |
|-------------------------------------------------------------|-----------------------------------------|-------------------------------|-----------------------------------|--------------------------|------------------------------|
| No                                                          | Cladogenetic                            | 93                            | 0.92                              | 13                       | 0.10                         |
| No                                                          | Anagenetic                              | 89                            | 0.91                              | 31                       | 0.12                         |
| No                                                          | Mixed                                   | 88                            | 0.84                              | 0                        | 0.0                          |
| Yes                                                         | Cladogenetic                            | 78                            | 0.87                              | 15                       | 0.09                         |
| Yes                                                         | Anagenetic                              | 83                            | 0.91                              | 36                       | 0.12                         |
| Yes                                                         | Mixed                                   | 62                            | 0.80                              | 2                        | 0.10                         |

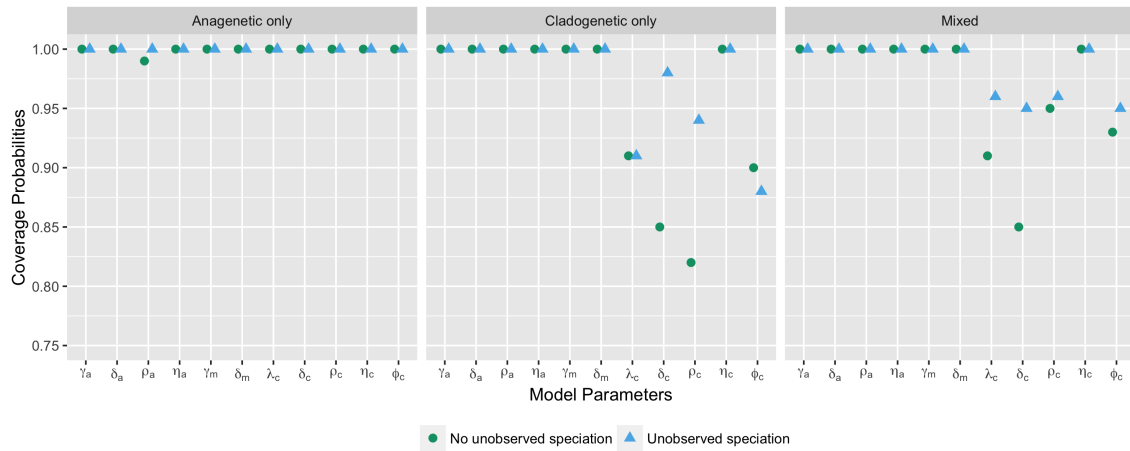

Figure 4: **Experiment 2 results: the effect of using a model that accounts for unobserved speciation on coverage probabilities of chromosome model parameters.** Each point represents the proportion of simulation replicates for which the 95% HPD interval contains the true value of the model parameter. Coverage probabilities of 1.00 mean perfect coverage. The circles represent coverage probabilities for estimates made using the non-SSE model that does not account for unobserved speciation, and the triangles represent coverage probabilities for estimates made using ChromoSSE that does account for unobserved speciation.

**Table 4: Experiments 2 and 3 results: the effects of using a model that accounts for unobserved speciation and of jointly estimating diversification rates on ancestral chromosome number estimates.** This table compares estimates of chromosome evolution using a non-SSE model that does not account for unobserved speciation events with ChromoSSE that does account for unobserved speciation events (Experiment 2), and compares estimates of chromosome evolution when jointly estimated with speciation and extinction rates versus when the true speciation and extinction rates are given (Experiment 3). Regardless of the true mode of chromosome evolution, the use of a model that accounts for unobserved speciation increases uncertainty in root state estimates. The columns from left to right are: 1) an indication of which experiment the results pertain to, 2) an indication of whether or not the estimates were made with ChromoSSE (that accounts for unobserved speciation), 3) whether diversification rates were jointly estimated with chromosome evolution, 4) the percent of simulation replicates in which the true chromosome number at the root used to simulate the data was found to be the MAP estimate, 5) the mean posterior probability of the MAP estimate of the true root chromosome number.

| Experiment # | Estimates Made w/ Model That Accounted for Unobserved Speciation? | Speciation and Extinction Rates Jointly Estimated? | Mode of Evolution Used to Simulate Data | True Root State Estimated (%) | Mean Posterior of True Root State |
|--------------|-------------------------------------------------------------------|----------------------------------------------------|-----------------------------------------|-------------------------------|-----------------------------------|
| 2            | No                                                                | No                                                 | Cladogenetic                            | 78                            | 0.87                              |
| 2            | No                                                                | No                                                 | Anagenetic                              | 83                            | 0.91                              |
| 2            | No                                                                | No                                                 | Mixed                                   | 62                            | 0.80                              |
| 2 & 3        | Yes                                                               | Yes                                                | Cladogenetic                            | 78                            | 0.81                              |
| 2 & 3        | Yes                                                               | Yes                                                | Anagenetic                              | 80                            | 0.86                              |
| 2 & 3        | Yes                                                               | Yes                                                | Mixed                                   | 61                            | 0.72                              |
| 3            | Yes                                                               | No                                                 | Cladogenetic                            | 78                            | 0.84                              |
| 3            | Yes                                                               | No                                                 | Anagenetic                              | 83                            | 0.90                              |
| 3            | Yes                                                               | No                                                 | Mixed                                   | 62                            | 0.76                              |

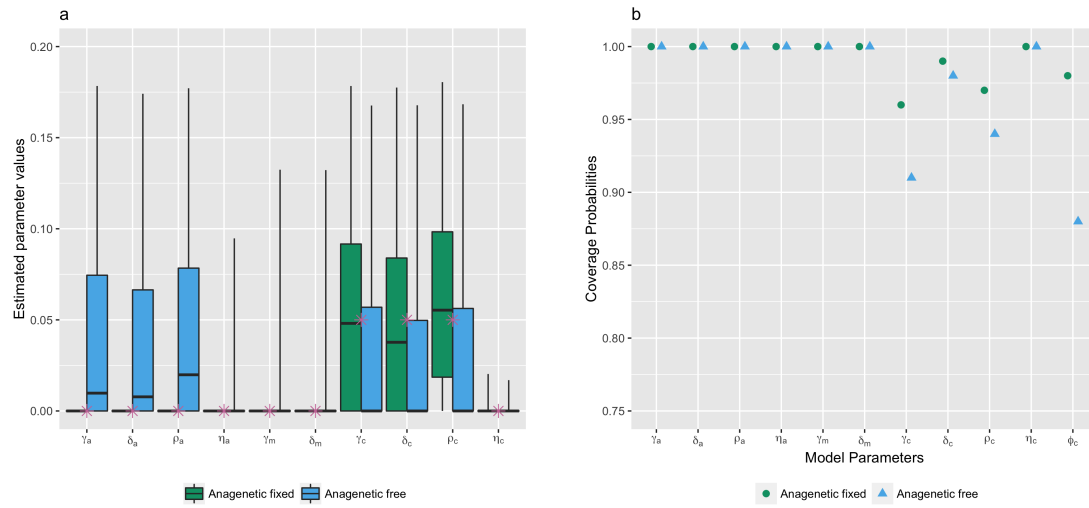

Figure 5: **Experiment 4 results: testing identifiability of cladogenetic parameters under ChromoSSE.** a) Chromosome parameter value estimates from 100 simulation replicates under a simulation scenario with no anagenetic changes (cladogenetic only). The stars represent true values. The box plots compare parameter estimates made when anagenetic parameters were fixed to 0 to estimates made when all parameters were free. When all parameters were free the anagenetic parameters were overestimated and cladogenetic parameters were underestimated. When the anagenetic parameters were fixed to 0 the estimates for the cladogenetic parameters were more accurate. b) Coverage probabilities of chromosome evolution parameters under the cladogenetic only model of chromosome evolution. The accuracy of cladogenetic parameter estimates increased when anagenetic parameters were fixed to 0.

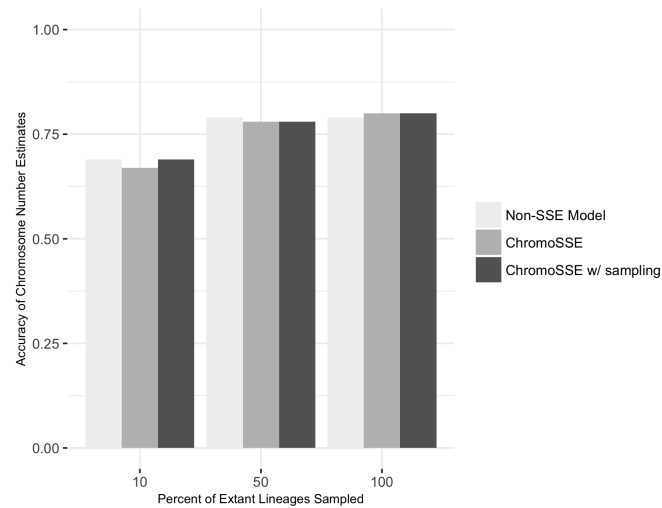

Figure 6: **Experiment 5 results: the effect of incomplete sampling.** The accuracy of ancestral chromosome number estimates slightly declined as the percentage of sampled extant lineages decreased from 100% to 50%, and decreased more quickly once the percentage of extant lineages decreased to 10%. There was little difference between the non-SSE model (light grey) that does not take into account unobserved speciation and ChromoSSE (medium and dark grey) which does take into account unobserved speciation. Furthermore, little difference in accuracy was detected using ChromoSSE with the taxon sampling probability  $\rho_s$  set to 1.0 (medium grey) and with  $\rho_s$  set to the true value (0.1, 0.5, or 1.0; dark grey). The accuracy of chromosome number estimates was measured by the proportion of simulation replicates for which the estimated MAP root chromosome number corresponded with the true chromosome number used to simulate the data.

543

### *Empirical Data*

544 Model averaged MAP estimates of ancestral chromosome numbers for each  
545 of the five empirical datasets are shown in Figures 7, 8, 9, 10, and 11. The mean  
546 model-averaged chromosome number evolution parameter value estimates for the  
547 empirical datasets are reported in Table 5. Posterior probabilities for the MAP

548 model of chromosome number evolution were low for all datasets, varying between  
549 0.04 for *Carex* section *Spirostachyae* and 0.21 for *Helianthus* (Table 6). Bayes  
550 factors supported unique, clade-specific combinations of anagenetic and  
551 cladogenetic parameters for all five datasets (Table 6). None of the clades had  
552 support for purely anagenetic or purely cladogenetic models of chromosome  
553 evolution.

554 The ancestral state reconstructions for *Aristolochia* were highly similar to  
555 those found by Mayrose et al. (2010). We found a moderately supported root  
556 chromosome number of 8 (posterior probability 0.45), and a polyploidization event  
557 on the branch leading to the *Isotrema* clade which has a base chromosome number  
558 of 16 with high posterior probability (0.88; Figure 7). On the branch leading to the  
559 main *Aristolochia* clade we found a dysploid loss of a single chromosome. Overall,  
560 we estimated moderate rates of anagenetic dysploid and polyploid changes, and the  
561 rates of cladogenetic change were 0 except for a moderate rate of cladogenetic  
562 dysploid loss (Tables 5). There was only one cladogenetic change inferred in the  
563 MAP ancestral state reconstruction, which was a recent possible dysploid  
564 speciation event that split the sympatric west-central Mexican species *Aristolochia*  
565 *tentaculata* and *A. taliscana*.

566 In *Helianthus*, on the other hand, we found high rates of cladogenetic  
567 polyploidization, and low rates of anagenetic change (Tables 5). 12 separate  
568 possible polyploid speciation events were identified over the phylogeny (Figure 8),  
569 and cladogenetic polyploidization made up 16% of all observed and unobserved  
570 speciation events. Bayes factors gave very strong support for models that included



571 cladogenetic polyploidization as well as anagenetic demi-polyploidization (Table 6),  
572 the latter explaining the frequent anagenetic transitions from 34 to 51 chromosomes  
573 found in the MAP ancestral state reconstruction. The well supported root  
574 chromosome number of 17 (posterior probability 0.91) corresponded with the  
575 findings of Mayrose et al. (2010).

576 As opposed to the *Helianthus* results, the *Carex* section *Spirostachyae*  
577 estimates had very low rates of polyploidization and instead had high rates of  
578 cladogenetic dysploid change (Tables 5). An estimated 36.9% of all observed and  
579 unobserved speciation events included a cladogenetic gain or loss of a single  
580 chromosome. Overall, the rates of anagenetic changes were estimated to be much  
581 lower than the rates of cladogenetic changes. Bayes factors did not support either  
582 anagenetic or cladogenetic polyploidization (Table 6). The MAP root chromosome  
583 number of 37, despite being very weakly supported (0.08), corresponds with the  
584 findings of Escudero et al. (2014), where it was also poorly supported (Figure 9).

585 In *Primula*, we found a base chromosome number for section *Aleuritia* of 9  
586 with high posterior probability (0.82; Figure 10), which agrees with estimates from  
587 Glick and Mayrose (2014). We estimated moderate rates of anagenetic and  
588 cladogenetic changes, including both cladogenetic polyploidization and  
589 demi-polyploidization (Table 5). The MAP ancestral state estimates include an  
590 inferred history of possible polyploid and demi-polyploid speciation events in the  
591 clade containing the tetraploid *Primula halleri* and the hexaploid *P. scotica*.  
592 *Primula* is the only dataset out of the five analysed here for which Bayes factors  
593 supported the inclusion of cladogenetic demi-polyploidization (Table 6).

Table 5: **Mean model-averaged parameter value estimates for empirical datasets.** Rates for all parameters are given in units of chromosome changes per branch length unit except for  $\mu$  which is given in extinction events per time units.

| Clade                                         | $\gamma_a$ | $\delta_a$ | $\rho_a$ | $\eta_a$ | $\gamma_m$ | $\delta_m$ | $\phi_c$ | $\gamma_c$ | $\delta_c$ | $\rho_c$ | $\eta_c$ | $\mu$ |
|-----------------------------------------------|------------|------------|----------|----------|------------|------------|----------|------------|------------|----------|----------|-------|
| <i>Aristolochia</i>                           | 0.02       | 0.05       | 0.01     | 0.0      | -0.01      | -0.01      | 0.43     | 0.0        | 0.04       | 0.0      | 0.0      | 0.19  |
| <i>Carex</i> section<br><i>Spirostachyae</i>  | 0.19       | 0.79       | 0.16     | 0.13     | 0.0        | 0.04       | 2.49     | 2.15       | 0.15       | 0.95     | 0.5      | 2.26  |
| <i>Helianthus</i>                             | 0.0        | 0.02       | 0.0      | 0.03     | -0.0       | -0.0       | 0.68     | 0.0        | 0.0        | 0.13     | 0.0      | 0.09  |
| <i>Mimulus</i> s.l.                           | 0.03       | 0.02       | 0.01     | 0.0      | 0.02       | 0.02       | 0.65     | 0.0        | 0.0        | 0.05     | 0.0      | 0.16  |
| <i>Primula</i><br>section<br><i>Aleuritia</i> | 0.01       | 0.05       | 0.01     | 0.01     | -0.0       | -0.0       | 2.39     | 0.01       | 0.03       | 0.15     | 0.09     | 2.47  |

594 The well supported root chromosome number of 8 (posterior probability  
595 0.90) found for *Mimulus* s.l. corresponds with the inferences reported in Beardsley  
596 et al. (2004). We estimated moderate rates of anagenetic dysploid gains and losses,  
597 as well as a moderate rate of cladogenetic polyploidization (Table 5). Bayes factors  
598 also supported models that included anagenetic dysploid gain and loss, as well as  
599 cladogenetic polyploidization (Table 6). The MAP ancestral state reconstruction  
600 revealed that most of the possible polyploid speciation events took place in the  
601 *Diplacus* clade, particularly in the clade containing the tetraploids *Mimulus*  
602 *cupreus*, *M. glabratus*, *M. luteus*, and *M. yecorensis* (Figure 11). Additionally, an  
603 ancient cladogenetic polyploidization event is inferred for the split between the two  
604 main *Diplacus* clades at about 5 million time units ago.

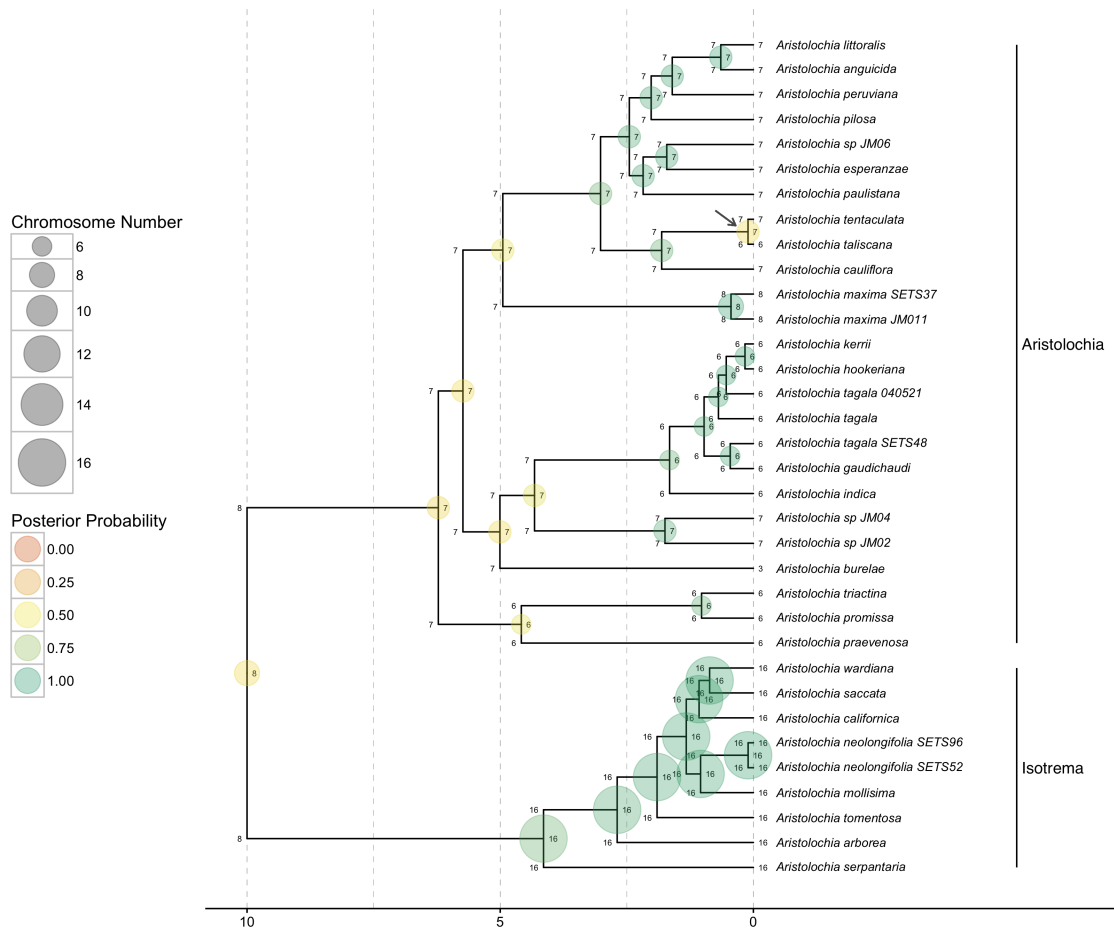

Figure 7: **Ancestral chromosome number estimates of *Aristolochia*.** The model averaged MAP estimate of ancestral chromosome numbers are shown at each branch node. The states of each daughter lineage immediately after cladogenesis are shown at the “shoulders” of each node. The size of each circle is proportional to the chromosome number and the color represents the posterior probability. The MAP root chromosome number is 8 with a posterior probability of 0.45. The grey arrow highlights the possible dysploid speciation event leading to the west-central Mexican species *Aristolochia tentaculata* and *A. taliscana*. Clades corresponding to subgenera are indicated at right.

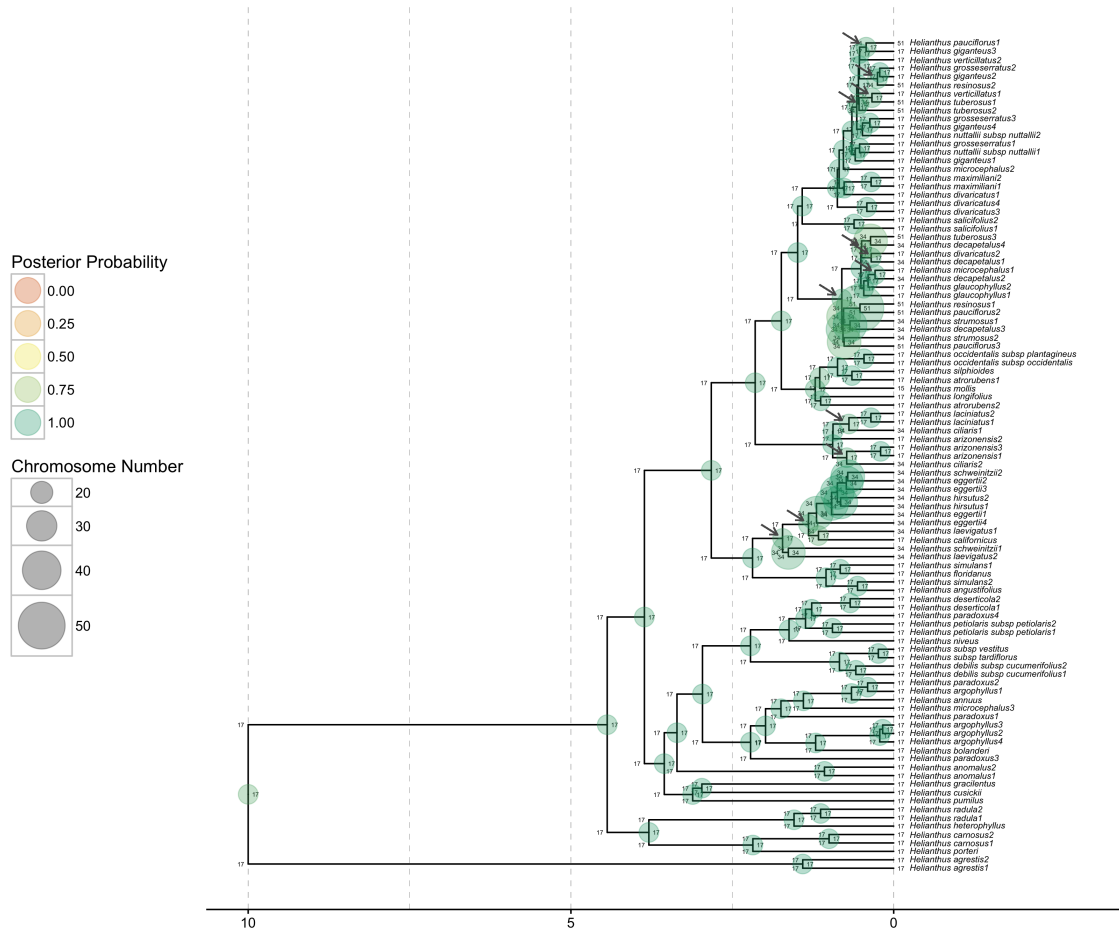

Figure 8: **Ancestral chromosome number estimates of *Helianthus*.** The model averaged MAP estimate of ancestral chromosome numbers are shown at each branch node. The states of each daughter lineage immediately after cladogenesis are shown at the “shoulders” of each node. The size of each circle is proportional to the chromosome number and the color represents the posterior probability. The MAP root chromosome number is 17 with a posterior probability of 0.91. The grey arrows show the locations of 12 inferred polyploid speciation events.

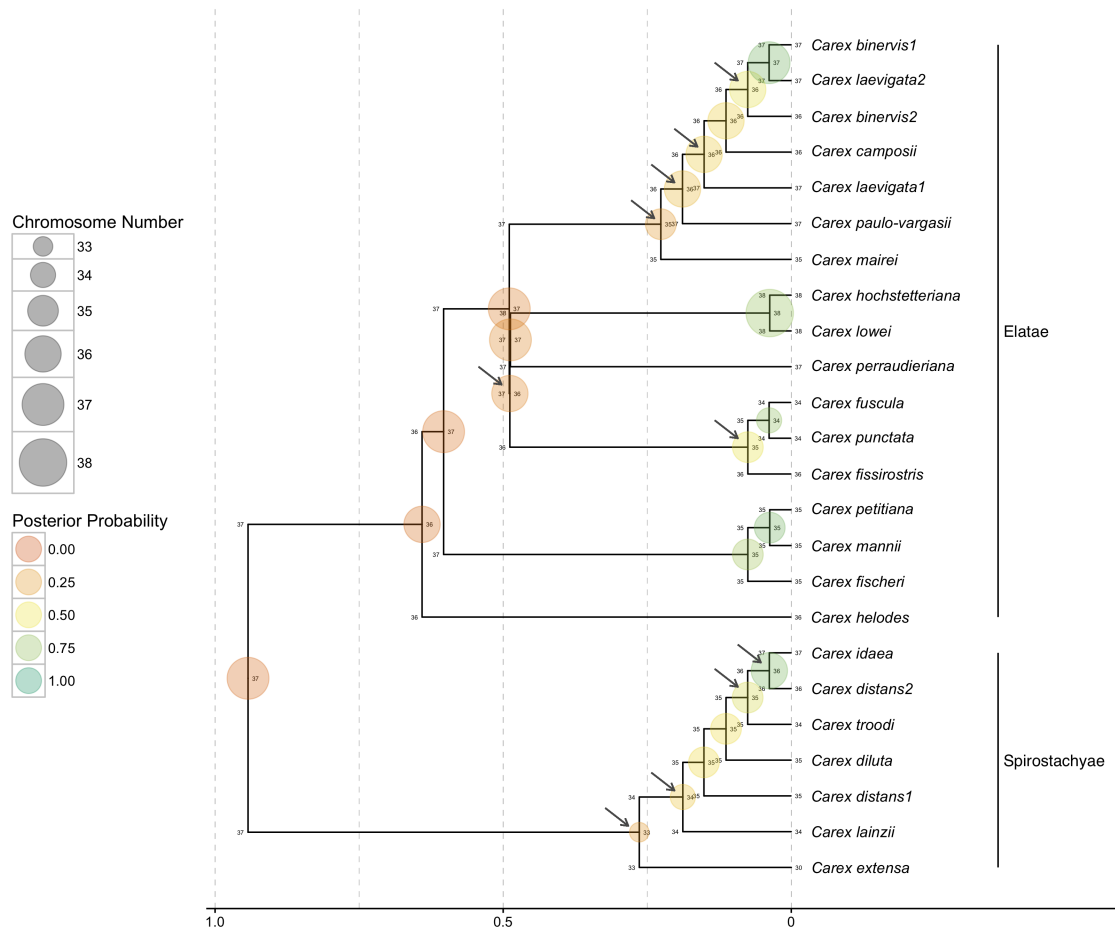

Figure 9: **Ancestral chromosome number estimates of *Carex* section *Spirostachyae*.** The model averaged MAP estimate of ancestral chromosome numbers are shown at each branch node. The states of each daughter lineage immediately after cladogenesis are shown at the “shoulders” of each node. The size of each circle is proportional to the chromosome number and the color represents the posterior probability. The MAP root chromosome number is 37 with a posterior probability of 0.08. Grey arrows indicate the location of possible dysploid speciation events. 36.9% of all speciation events include a cladogenetic gain or loss of a single chromosome. Clades corresponding to subsections are indicated at right.

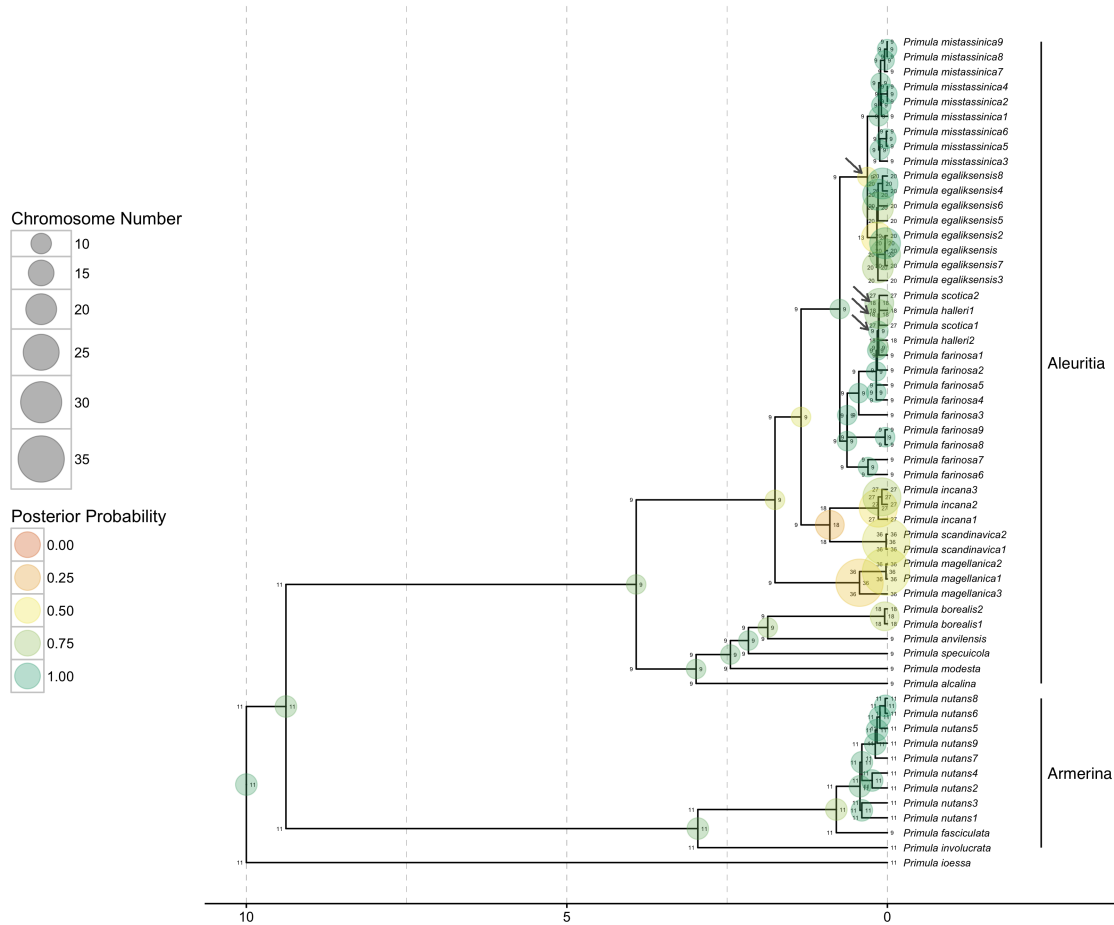

Figure 10: **Ancestral chromosome number estimates of *Primula* section *Aleuritia*.** The model averaged MAP estimate of ancestral chromosome numbers are shown at each branch node. The states of each daughter lineage immediately after cladogenesis are shown at the “shoulders” of each node. The size of each circle is proportional to the chromosome number and the color represents the posterior probability. The MAP root chromosome number of section *Aleuritia* is 9 with a posterior probability of 0.82. The arrows show the inferred history of possible polyploid and demi-polyploid speciation events in the clade containing the tetraploids *Primula egaliksensis* and *P. halleri* and the hexaploid *P. scotica*. Clades corresponding to sections are indicated at right.

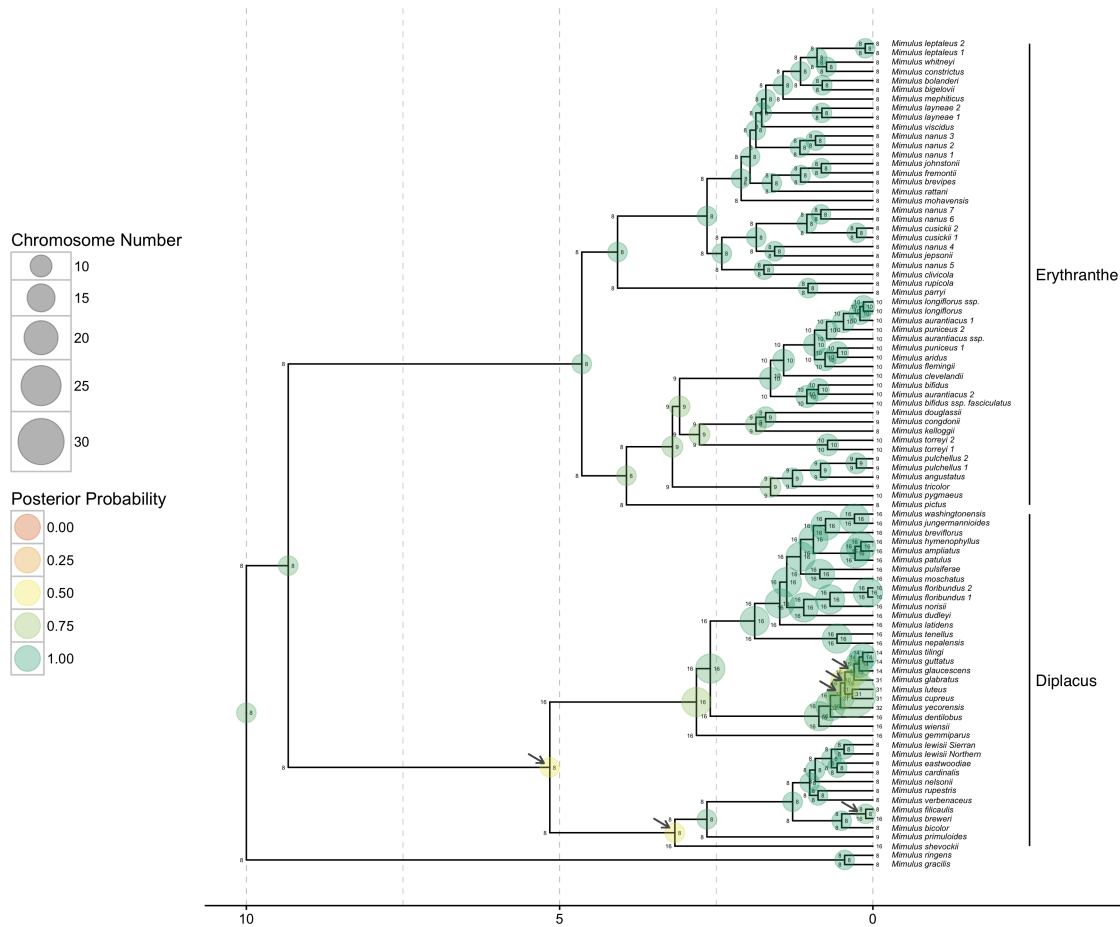

Figure 11: **Ancestral chromosome number estimates of *Mimulus sensu lato*.** The model averaged MAP estimate of ancestral chromosome numbers are shown at each branch node. The states of each daughter lineage immediately after cladogenesis are shown at the “shoulders” of each node. The size of each circle is proportional to the chromosome number and the color represents the posterior probability. The MAP root chromosome number is 8 with a posterior probability of 0.90. The arrows highlight the inferred history of repeated polyploid speciation events in the Diplacus clade, which contains the tetraploids *Mimulus cupreus*, *M. glabratus*, *M. luteus*, and *M. yecorensis*. Clades corresponding to segregate genera are indicated at right.





## DISCUSSION

605

606       The results from the empirical analyses show that the ChromoSSE models  
607 detect strikingly different modes of chromosome evolution with clade-specific  
608 combinations of anagenetic and cladogenetic processes. Anagenetic dysploid gains  
609 and losses were supported in nearly all clades; however, cladogenetic dysploid  
610 changes were supported only in *Carex*. The occurrence of anagenetic dysploid  
611 changes in all clades suggest that small chromosome number changes due to gains  
612 and losses may frequently have a minimal effect on the formation of reproductive  
613 isolation, though our results suggest that *Carex* may be a notable exception.  
614 Anagenetic polyploidization was only supported in *Aristolochia*, while cladogenetic  
615 polyploidization was supported in *Helianthus*, *Mimulus* s.l., and *Primula*. These  
616 findings confirm the evidence presented by Zhan et al. (2016) that polyploidization  
617 events could play a significant role during plant speciation.

618       Our models shed new light on the importance of whole genome duplications  
619 as a key driver in evolutionary diversification processes. *Helianthus* has long been  
620 understood to have a complex history of polyploid speciation (Timme et al. 2007),  
621 but our results here are the first to statistically show the prevalence of cladogenetic  
622 polyploidization in *Helianthus* (occurring at 16% of all speciation events) and how  
623 few of the chromosome changes are estimated to be anagenetic. Polyploid  
624 speciation has also been suspected to be common in *Mimulus* s.l. (Vickery 1995),  
625 and indeed we estimated that 7% of speciation events were cladogenetic  
626 polyploidization events. We also estimated that the rates of cladogenetic  
627 dysploidization in *Mimulus* s.l. were 0, which is in contrast to the parsimony based

628 inferences presented in Beardsley et al. (2004), which estimated 11.5% of all  
629 speciation events included polyploidization and 13.3% included dysploidization.  
630 Their estimates, however, did not distinguish cladogenetic from anagenetic  
631 processes, and so they likely underestimated anagenetic changes. Our ancestral  
632 state reconstructions of chromosome number evolution for *Helianthus*, *Mimulus* s.l.,  
633 and *Primula* show that polyploidization events generally occurred in the relatively  
634 recent past; few ancient polyploidization events were reconstructed (one exception  
635 being the ancient cladogenetic polyploidization event in *Mimulus* clade *Diplacus*).  
636 This pattern appears to be consistent with recent studies that show polyploid  
637 lineages may undergo decreased net diversification (Mayrose et al. 2011; Scarpino  
638 et al. 2014), leading some to suggest that polyploidization may be an evolutionary  
639 dead-end (Arrigo and Barker 2012). While in the analyses presented here we fixed  
640 rates of speciation and extinction through time and across lineages, an obvious  
641 extension of our models would be to allow these rates to vary across the tree and  
642 statistically test for rate changes in polyploid lineages.

643 Our findings also suggest dysploid changes may play a significant role in the  
644 speciation process of some lineages. The genus *Carex* is distinguished by  
645 holocentric chromosomes that undergo common fusion and fission events but rarely  
646 polyploidization (Hipp 2007). This concurs with our findings from *Carex* section  
647 *Spirostachyae*, where we saw no support for models including either anagenetic or  
648 cladogenetic polyploidization. Instead we found high rates of cladogenetic dysploid  
649 change, which is congruent with earlier results that show that *Carex* diversification  
650 is driven by processes of fission and fusion occurring with cladogenetic shifts in

651 chromosome number (Hipp 2007; Hipp et al. 2007). Hipp (2007) proposed a  
652 speciation scenario for *Carex* in which the gradual accumulation of chromosome  
653 fusions, fissions, and rearrangements in recently diverged populations increasingly  
654 reduce the fertility of hybrids between populations, resulting in high species  
655 richness. More recently, Escudero et al. (2016) found that chromosome number  
656 differences in *Carex scoparia* led to reduced germination rates, suggesting hybrid  
657 dysfunction could spur chromosome speciation in *Carex*. Holocentricity has arisen  
658 at least 13 times independently in plants and animals (Melters et al. 2012), thus  
659 future work could examine chromosome number evolution in other holocentric  
660 clades and test for similar patterns of cladogenetic fission and fusion events.

661         The models presented here could also be used to further study the role of  
662 divergence in genomic architecture during sympatric speciation. Chromosome  
663 structural differences have been proposed to perform a central role in sympatric  
664 speciation, both in plants (Gottlieb 1973) and animals (Feder et al. 2005; Michel  
665 et al. 2010). In *Aristolochia* we found most changes in chromosome number were  
666 estimated to be anagenetic, with the only cladogenetic change occurring among a  
667 pair of recently diverged sympatric species. By coupling our chromosome evolution  
668 models with models of geographic range evolution it would be possible to  
669 statistically test whether the frequency of cladogenetic chromosome changes  
670 increase in sympatric speciation events compared to allopatric speciation events,  
671 thereby testing for interaction between these two different processes of reproductive  
672 isolation and evolutionary divergence.

673         The simulation results from Experiment 1 demonstrate that extinction

674 reduces the accuracy of inferences made by models of chromosome evolution that  
675 do not take into account unobserved speciation events. Furthermore, the  
676 simulations performed in Experiments 2 and 3 show that the substantial  
677 uncertainty introduced in our analyses by jointly estimating diversification rates  
678 and chromosome evolution resulted in lower posterior probabilities for ancestral  
679 state reconstructions. We feel that this is a strength of our method; the lower  
680 posterior probabilities incorporate true uncertainty due to extinction and so  
681 represent more conservative estimates. Additionally, the simulation results from  
682 Experiment 4 reveal that rates of anagenetic evolution were overestimated and  
683 rates of cladogenetic change were underestimated when the generating process  
684 consisted only of cladogenetic events. This suggests the possibility that our models  
685 of chromosome number evolution are only partially identifiable, and that the results  
686 of our empirical analyses may have a similar bias towards overestimating  
687 anagenetic evolution and underestimating cladogenetic evolution. This bias may be  
688 an issue for all ClaSSE type models, but the practical consequences here are  
689 conservative estimates of cladogenetic chromosome evolution.

690         An important caveat for all phylogenetic methods is that estimates of model  
691 parameters and ancestral states can be highly sensitive to taxon sampling (Heath  
692 et al. 2008). All of the empirical datasets examined here included non-monophyletic  
693 taxa that were treated as separate lineages. We made the unrealistic assumptions  
694 that 1) each of the non-monophyletic lineages sharing a taxon name have the same  
695 cytotype, and 2) the taxon sampling probability ( $\rho_s$ ) for the birth-death process was  
696 1.0. The former assumption could drastically affect ancestral state estimates, but

697 its effect can only be confirmed by obtaining chromosome counts for each lineage  
698 regardless of taxon name. While the results from simulation Experiment 5 showed  
699 that fixing  $\rho_s$  to 1.0 did not decrease the accuracy of inferred ancestral states, we  
700 still performed extra analyses of the empirical datasets with different values of  $\rho_s$   
701 (results not shown). The results indicated that total speciation and extinction rates  
702 are sensitive to  $\rho_s$ , but the relative speciation rates (e.g. between  $\phi_c$  and  $\gamma_c$ )  
703 remained similar. The ancestral state estimates of cladogenetic and anagenetic  
704 chromosome changes were robust to different values of  $\rho_s$ . This could vary among  
705 datasets and care should be taken when considering which lineages to sample.

706 Bayesian model averaging is particularly appropriate for models of  
707 chromosome number evolution since conditioning on a single model ignores the  
708 considerable degree of model uncertainty found in both the simulations and the  
709 empirical analyses. In the simulations the true model of chromosome evolution was  
710 rarely inferred to be the MAP model (< 39% of replicates), and in the instances it  
711 was correctly identified the posterior probability of the MAP model was < 0.13.  
712 The posterior probabilities of the MAP models for the empirical datasets were  
713 similarly low, varying between 0.04 and 0.22. Conditioning on a single poorly  
714 fitting model of chromosome evolution, even when it is the best model available,  
715 results in an underestimate of the uncertainty of ancestral chromosome numbers.  
716 Furthermore, Bayesian model averaging enabled us to detect different modes of  
717 chromosome number evolution without the limitation of traditional model testing  
718 procedures in which multiple analyses are performed that each condition on a  
719 different single model. This is a particularly useful approach when the space of all

720 possible models is large.

721       Our RevBayes implementation facilitates model modularity and easy  
722 experimentation. Experimenting with different priors or MCMC moves is achieved  
723 by simply editing the Rev scripts that describe the model. Though in our analyses  
724 here we ignored phylogenetic uncertainty by assuming a fixed known tree, we could  
725 easily incorporate this uncertainty by modifying a couple lines of the Rev script to  
726 integrate over a previously estimated posterior distribution of trees. We could also  
727 use molecular sequence data simultaneously with the chromosome models to jointly  
728 infer phylogeny and chromosome evolution, allowing the chromosome data to help  
729 inform tree topology and divergence times. In this paper we chose not to perform  
730 joint inference so that we could isolate the behavior of the chromosome evolution  
731 models; however, this is a promising direction for future research.

732       There are a number of challenging directions for future work on phylogenetic  
733 chromosome evolution models. Models that incorporate multiple aspects of  
734 chromosome morphology such as translocations, inversions, and other gene synteny  
735 data as well as the presence of ring and/or B chromosomes have yet to be  
736 developed. None of our models currently account for allopolyploidization; indeed  
737 few phylogenetic comparative methods can handle reticulate evolutionary scenarios  
738 that result from allopolyploidization and other forms of hybridization (Marcussen  
739 et al. 2015). A more tractable problem is mapping chromosome number changes  
740 along the branches of the phylogeny, as opposed to simply making estimates at the  
741 nodes as we have done here. Since the approach described here models both  
742 anagenetic and cladogenetic chromosome evolution processes while accounting for

743 unobserved speciation events, the rejection sampling procedure used in standard  
744 stochastic character mapping (Nielsen 2002; Huelsenbeck et al. 2003) is not  
745 sufficient. While data augmentation approaches such as those described by Bokma  
746 (2008) could be utilized, they require complex MCMC algorithms that may have  
747 difficulty mixing. Another option is to extend the method described in this paper  
748 to draw joint ancestral states by numerically integrating root-to-tip over the tree  
749 into a new procedure called joint conditional character mapping. This sort of  
750 approach would infer the joint MAP history of chromosome changes both at the  
751 nodes and along the branches of the tree, and provide an alternative to stochastic  
752 character mapping that will work for all ClaSSE type models.

### 753 *Conclusions*

754 The analyses presented here show that the ChromoSSE models of  
755 chromosome number evolution successfully infer different clade-specific modes of  
756 chromosome evolution as well as the history of anagenetic and cladogenetic  
757 chromosome number changes for a clade, including reconstructing the timing and  
758 location of possible chromosome speciation events over the phylogeny. These  
759 models will help investigators study the mode and history of chromosome evolution  
760 within individual clades of interest as well as advance understanding of how  
761 fundamental changes in the architecture of the genome such as whole genome  
762 duplications affect macroevolutionary patterns and processes across the tree of life.

### 763 FUNDING

764 WAF was supported by a National Science Foundation Graduate Research  
765 Fellowship under Grant DGE 1106400. SH was supported by the Miller Institute  
766 for basic research in science. Analyses were computed using XSEDE, which is  
767 supported by National Science Foundation grant number ACI-1053575, and the  
768 Savio computational cluster provided by the Berkeley Research Computing  
769 program at the University of California, Berkeley.

## 770 ACKNOWLEDGEMENTS

771 Thank you to Bruce Baldwin, Emma Goldberg, and Michael Landis for  
772 valuable discussions. We also wish to thank two anonymous reviewers for their  
773 thoughtful feedback that improved this work.

774 \*

## 775 References

- 776 Akaike, H. 1974. A new look at the statistical model identification. IEEE  
777 Transactions on Automatic Control 19:716–723.
- 778 Arrigo, N. and M. S. Barker. 2012. Rarely successful polyploids and their legacy in  
779 plant genomes. Current Opinion in Plant Biology 15:140–146.
- 780 Ayala, F. J. and M. Coluzzi. 2005. Chromosome speciation: humans, *Drosophila*,  
781 and mosquitoes. Proceedings of the National Academy of Sciences USA  
782 102:6535–6542.



- 783 Beardsley, P. M., S. E. Schoenig, J. B. Whittall, and R. G. Olmstead. 2004.  
784 Patterns of evolution in western North American *Mimulus* (Phrymaceae).  
785 *American Journal of Botany* 91:474–489.
- 786 Benson, D. A., I. Karsch-Mizrachi, D. J. Lipman, J. Ostell, and D. L. Wheeler.  
787 2005. Genbank. *Nucleic Acids Research* 33:D34–D38.
- 788 Bokma, F. 2002. Detection of punctuated equilibrium from molecular phylogenies.  
789 *Journal of Evolutionary Biology* 15:1048–1056.
- 790 Bokma, F. 2008. Detection of “punctuated equilibrium” by Bayesian estimation of  
791 speciation and extinction rates, ancestral character states, and rates of anagenetic  
792 and cladogenetic evolution on a molecular phylogeny. *Evolution* 62:2718–2726.
- 793 Conti, E., E. Suring, D. Boyd, J. Jorgensen, J. Grant, and S. Kelso. 2000.  
794 Phylogenetic relationships and character evolution in *Primula* L.: the usefulness  
795 of ITS sequence data. *Plant Biosystems* 134:385–392.
- 796 Coyne, J. A., H. A. Orr, et al. 2004. *Speciation*. Sinauer Associates Sunderland,  
797 MA.
- 798 Dobzhansky, T. G. 1937. *Genetics and the Origin of Species*. Columbia University  
799 Press.
- 800 Escudero, M., M. Hahn, B. H. Brown, K. Lueders, and A. L. Hipp. 2016.  
801 Chromosomal rearrangements in holocentric organisms lead to reproductive  
802 isolation by hybrid dysfunction: The correlation between karyotype

803 rearrangements and germination rates in sedges. *American Journal of Botany*  
804 103:1529–1536.

805 Escudero, M., A. L. Hipp, and M. Luceño. 2010. Karyotype stability and predictors  
806 of chromosome number variation in sedges: a study in *Carex* section  
807 *Spirostachyae* (Cyperaceae). *Molecular Phylogenetics and Evolution* 57:353–363.

808 Escudero, M., S. Martín-Bravo, I. Mayrose, M. Fernández-Mazuecos,  
809 O. Fiz-Palacios, A. L. Hipp, M. Pimentel, P. Jiménez-Mejías, V. Valcárcel,  
810 P. Vargas, et al. 2014. Karyotypic changes through dysploidy persist longer over  
811 evolutionary time than polyploid changes. *PLOS ONE* 9:e85266.

812 Feder, J. L., X. Xie, J. Rull, S. Velez, A. Forbes, B. Leung, H. Dambroski, K. E.  
813 Filchak, and M. Aluja. 2005. Mayr, Dobzhansky, and Bush and the complexities  
814 of sympatric speciation in *Rhagoletis*. *Proceedings of the National Academy of*  
815 *Sciences USA* 102:6573–6580.

816 Felsenstein, J. 1981. Evolutionary trees from dna sequences: a maximum likelihood  
817 approach. *Journal of Molecular Evolution* 17:368–376.

818 FitzJohn, R. G. 2012. Diversitree: comparative phylogenetic analyses of  
819 diversification in R. *Methods in Ecology and Evolution* 3:1084–1092.

820 Glick, L. and I. Mayrose. 2014. Chromevol: assessing the pattern of chromosome  
821 number evolution and the inference of polyploidy along a phylogeny. *Molecular*  
822 *Biology and Evolution* 31:1914–1922.

- 823 Goldberg, E. E. and B. Igić. 2012. Tempo and mode in plant breeding system  
824 evolution. *Evolution* 66:3701–3709.
- 825 Gottlieb, L. D. 1973. Genetic differentiation, sympatric speciation, and the origin of  
826 a diploid species of *Stephanomeria*. *American Journal of Botany* Pages 545–553.
- 827 Green, P. J. 1995. Reversible jump Markov chain Monte Carlo computation and  
828 Bayesian model determination. *Biometrika* 82:711–732.
- 829 Guggisberg, A., G. Mansion, and E. Conti. 2009. Disentangling reticulate evolution  
830 in an arctic–alpine polyploid complex. *Systematic Biology* 58:55–73.
- 831 Hastings, W. K. 1970. Monte Carlo sampling methods using Markov chains and  
832 their applications. *Biometrika* 57:97–109.
- 833 Heath, T. A., S. M. Hedtke, and D. M. Hillis. 2008. Taxon sampling and the  
834 accuracy of phylogenetic analyses. *Journal of Systematics and Evolution*  
835 46:239–257.
- 836 Hipp, A. L. 2007. Nonuniform processes of chromosome evolution in sedges (*Carex*:  
837 *Cyperaceae*). *Evolution* 61:2175–2194.
- 838 Hipp, A. L., P. E. Rothrock, A. A. Reznicek, and P. E. Berry. 2007. Chromosome  
839 number changes associated with speciation in sedges: a phylogenetic study in  
840 *Carex* section *Ovales* (*Cyperaceae*) using AFLP data. *Aliso: A Journal of*  
841 *Systematic and Evolutionary Botany* 23:193–203.

- 842 Hoeting, J. A., D. Madigan, A. E. Raftery, and C. T. Volinsky. 1999. Bayesian  
843 model averaging: a tutorial. *Statistical Science* 14:382–401.
- 844 Höhna, S. 2015. The time-dependent reconstructed evolutionary process with a  
845 key-role for mass-extinction events. *Journal of Theoretical Biology* 380:321–331.
- 846 Höhna, S., T. A. Heath, B. Boussau, M. J. Landis, F. Ronquist, and J. P.  
847 Huelsenbeck. 2014. Probabilistic graphical model representation in phylogenetics.  
848 *Systematic Biology* 63:753–771.
- 849 Höhna, S., M. J. Landis, T. A. Heath, B. Boussau, N. Lartillot, B. R. Moore, J. P.  
850 Huelsenbeck, and F. Ronquist. 2016. RevBayes: Bayesian phylogenetic inference  
851 using graphical models and an interactive model-specification language.  
852 *Systematic Biology* 65:726–736.
- 853 Huelsenbeck, J. P. and J. P. Bollback. 2001. Empirical and hierarchical Bayesian  
854 estimation of ancestral states. *Systematic Biology* 50:351–366.
- 855 Huelsenbeck, J. P., B. Larget, and D. L. Swofford. 2000. A compound Poisson  
856 process for relaxing the molecular clock 154:1879–1892.
- 857 Huelsenbeck, J. P., R. Nielsen, and J. P. Bollback. 2003. Stochastic mapping of  
858 morphological characters. *Systematic Biology* 52:131–158.
- 859 Kass, R. E. and A. E. Raftery. 1995. Bayes factors. *Journal of the American*  
860 *Statistical Association* 90:773–795.

- 861 Landis, M. J. in press. Biogeographic dating of speciation times using  
862 paleogeographically informed processes. *Systematic Biology* .
- 863 Landis, M. J., N. J. Matzke, B. R. Moore, and J. P. Huelsenbeck. 2013. Bayesian  
864 analysis of biogeography when the number of areas is large. *Systematic Biology*  
865 62:789–804.
- 866 Maddison, W. P., P. E. Midford, and S. P. Otto. 2007. Estimating a binary  
867 character's effect on speciation and extinction. *Systematic Biology* 56:701–710.
- 868 Madigan, D. and A. E. Raftery. 1994. Model selection and accounting for model  
869 uncertainty in graphical models using Occam's window. *Journal of the American*  
870 *Statistical Association* 89:1535–1546.
- 871 Marcussen, T., L. Heier, A. K. Brysting, B. Oxelman, and K. S. Jakobsen. 2015.  
872 From gene trees to a dated allopolyploid network: insights from the angiosperm  
873 genus *Viola* (Violaceae). *Systematic Biology* 64:84–101.
- 874 May, M. R., S. Höhna, and B. R. Moore. 2016. A Bayesian approach for detecting  
875 the impact of mass-extinction events on molecular phylogenies when rates of  
876 lineage diversification may vary. *Methods in Ecology and Evolution* 7:947–959.
- 877 Mayrose, I., M. S. Barker, and S. P. Otto. 2010. Probabilistic models of  
878 chromosome number evolution and the inference of polyploidy. *Systematic*  
879 *Biology* 59:132–144.
- 880 Mayrose, I., S. H. Zhan, C. J. Rothfels, K. Magnuson-Ford, M. S. Barker, L. H.

- 881 Rieseberg, and S. P. Otto. 2011. Recently formed polyploid plants diversify at  
882 lower rates. *Science* 333:1257–1257.
- 883 Melters, D. P., L. V. Paliulis, I. F. Korf, and S. W. Chan. 2012. Holocentric  
884 chromosomes: convergent evolution, meiotic adaptations, and genomic analysis.  
885 *Chromosome Research* 20:579–593.
- 886 Metropolis, N., A. W. Rosenbluth, M. N. Rosenbluth, A. H. Teller, and E. Teller.  
887 1953. Equation of state calculations by fast computing machines. *The Journal of*  
888 *Chemical Physics* 21:1087–1092.
- 889 Michel, A. P., S. Sim, T. H. Powell, M. S. Taylor, P. Nosil, and J. L. Feder. 2010.  
890 Widespread genomic divergence during sympatric speciation. *Proceedings of the*  
891 *National Academy of Sciences USA* 107:9724–9729.
- 892 Nee, S., R. M. May, and P. H. Harvey. 1994. The reconstructed evolutionary  
893 process. *Philosophical Transactions of the Royal Society B: Biological Sciences*  
894 344:305–311.
- 895 Nielsen, R. 2002. Mapping mutations on phylogenies. *Systematic Biology*  
896 51:729–739.
- 897 Ohi-Toma, T., T. Sugawara, H. Murata, S. Wanke, C. Neinhuis, and J. Murata.  
898 2006. Molecular phylogeny of *Aristolochia sensu lato* (Aristolochiaceae) based on  
899 sequences of *rbcL*, *matK*, and *phyA* genes, with special reference to  
900 differentiation of chromosome numbers. *Systematic Botany* 31:481–492.

- 901 Pagel, M. and A. Meade. 2006. Bayesian analysis of correlated evolution of discrete  
902 characters by reversible-jump Markov chain Monte Carlo. *The American*  
903 *Naturalist* 167:808–25.
- 904 Pagel, M., A. Meade, and D. Barker. 2004. Bayesian estimation of ancestral  
905 character states on phylogenies. *Systematic Biology* 53:673–684.
- 906 Pires, J. C. and K. L. Hertweck. 2008. A renaissance of cytogenetics: Studies in  
907 polyploidy and chromosomal evolution. *Annals of the Missouri Botanical Garden*  
908 95:275–281.
- 909 Posada, D. and T. R. Buckley. 2004. Model selection and model averaging in  
910 phylogenetics: advantages of Akaike information criterion and Bayesian  
911 approaches over likelihood ratio tests. *Systematic Biology* 53:793–808.
- 912 Pupko, T., I. Pe, R. Shamir, and D. Graur. 2000. A fast algorithm for joint  
913 reconstruction of ancestral amino acid sequences. *Molecular Biology and*  
914 *Evolution* 17:890–896.
- 915 Ree, R. H. and S. A. Smith. 2008. Maximum likelihood inference of geographic  
916 range evolution by dispersal, local extinction, and cladogenesis. *Systematic*  
917 *Biology* 57:4–14.
- 918 Rieseberg, L. H. and J. H. Willis. 2007. Plant speciation. *Science* 317:910–914.
- 919 Rodriguez, F., J. Oliver, A. Marin, and J. R. Medina. 1990. The general stochastic  
920 model of nucleotide substitution. *Journal of theoretical biology* 142:485–501.

- 921 Scarpino, S. V., D. A. Levin, and L. A. Meyers. 2014. Polyploid formation shapes  
922 flowering plant diversity. *The American Naturalist* 184:456–465.
- 923 Schwarz, G. 1978. Estimating the dimension of a model. *The Annals of Statistics*  
924 6:461–464.
- 925 Stebbins, G. L. 1971. *Chromosomal evolution in higher plants*. Edward Arnold  
926 Ltd., London.
- 927 Tank, D. C., J. M. Eastman, M. W. Pennell, P. S. Soltis, D. E. Soltis, C. E.  
928 Hinchliff, J. W. Brown, E. B. Sessa, and L. J. Harmon. 2015. Nested radiations  
929 and the pulse of angiosperm diversification: increased diversification rates often  
930 follow whole genome duplications. *New Phytologist* 207:454–467.
- 931 Tavaré, S. 1986. Some probabilistic and statistical problems in the analysis of DNA  
932 sequences. In: *Some Mathematical Questions in Biology—DNA Sequence*  
933 *Analysis*, Miura RM (Ed.), American Mathematical Society, Providence (RI)  
934 17:57–86.
- 935 Timme, R. E., B. B. Simpson, and C. R. Linder. 2007. High-resolution phylogeny  
936 for *Helianthus* (Asteraceae) using the 18S-26S ribosomal DNA external  
937 transcribed spacer. *American Journal of Botany* 94:1837–1852.
- 938 Vickery, R. K. 1995. Speciation by aneuploidy and polyploidy in *Mimulus*  
939 (*Scrophulariaceae*). *The Great Basin Naturalist* 55:174–176.
- 940 Vos, R. A., H. Lapp, W. H. Piel, and V. Tannen. 2010. Treebase2: rise of the  
941 machines .



- 942 White, M. J. D. 1978. Modes of speciation. San Francisco: WH Freeman  
943 455p.-Illus., maps, chrom. nos.. General (KR, 197800185).
- 944 Xie, W., P. O. Lewis, Y. Fan, L. Kuo, and M.-H. Chen. 2011. Improving marginal  
945 likelihood estimation for Bayesian phylogenetic model selection. *Systematic  
946 Biology* 60:150–60.
- 947 Yang, Z. 1994. Maximum likelihood phylogenetic estimation from DNA sequences  
948 with variable rates over sites: approximate methods. *Journal of Molecular  
949 Evolution* 39:306–314.
- 950 Zhan, S. H., M. Drori, E. E. Goldberg, S. P. Otto, and I. Mayrose. 2016.  
951 Phylogenetic evidence for cladogenetic polyploidization in land plants. *American  
952 Journal of Botany* 103:1252–1258.

Version dated: March 3, 2017

Supplementary Material for:  
**Cladogenetic and Anagenetic Models of  
Chromosome Number Evolution: a Bayesian  
Model Averaging Approach**

WILLIAM A. FREYMAN<sup>1</sup> AND SEBASTIAN HÖHNA<sup>1,2</sup>

<sup>1</sup>*Department of Integrative Biology, University of California, Berkeley, CA, 94720, USA;*

<sup>2</sup>*Department of Statistics, University of California, Berkeley, CA, 94720, USA*

**Corresponding author:** William A. Freyman, Department of Integrative Biology,  
University of California, Berkeley, CA, 94720, USA; E-mail: [freyman@berkeley.edu](mailto:freyman@berkeley.edu).

1 APPENDIX 1: VALIDATING REVBAYES ANCESTRAL  
2 STATE ESTIMATES

3 *Ancestral State Estimates of SSE Models*

4 The code repository [http://github.com/wf8/anc\\_state\\_validation](http://github.com/wf8/anc_state_validation)  
5 contains scripts to validate the Monte Carlo method of ancestral state estimation

6 for state-dependent speciation and extinction (SSE) models we implemented in  
7 RevBayes (Höhna et al. 2016) against the analytical marginal ancestral state  
8 estimation implemented in the R package diversitree (FitzJohn 2012).

9         Although the closest model to ChromoSSE implemented in diversitree is  
10 ClaSSE (Goldberg and Igić 2012), ancestral state estimation for ClaSSE is not  
11 implemented in diversitree. Therefore here we compare the ancestral state  
12 estimates for BiSSE (Maddison et al. 2007) as implemented in diversitree to the  
13 estimates made by RevBayes. Note that as implemented in RevBayes the BiSSE,  
14 ChromoSSE, ClaSSE, MuSSE (FitzJohn 2012), and HiSSE (Beaulieu and O’Meara  
15 2016) models use the same C++ classes and algorithms for parameter and  
16 ancestral state estimation, so validating ancestral state estimates for BiSSE should  
17 provide confidence in estimates made by RevBayes for all these SSE models.

18         In RevBayes we sample ancestral states for SSE models from their joint  
19 distribution conditional on the tip states and the model parameters during the  
20 MCMC. However, in this work we summarize the MCMC samples by calculating  
21 the marginal posterior probability of each node being in each state. So the  
22 RevBayes marginal ancestral state reconstructions which are estimated via MCMC  
23 are directly comparable to the analytical marginal ancestral states computed by  
24 diversitree. It would be possible to summarize the samples from the MCMC to  
25 reconstruct the maximum a posteriori joint ancestral state reconstruction, but we  
26 have not done so in this work.

27                     *Comparison of RevBayes Estimates to Diversitree*

28           Here we show ancestral state estimates under BiSSE for an example where  
29 the tree and tip data were simulated in diversitree with the following parameters:  
30  $\lambda_0 = 0.2$ ,  $\lambda_1 = 0.4$ ,  $\mu_0 = 0.01$ ,  $\mu_1 = 0.1$ , and  $q_{01} = q_{10} = 0.1$ . The ancestral state  
31 reconstructions from RevBayes and diversitree are shown in Figures 2 and 3,  
32 respectively.

33           The log-likelihood as computed by diversitree was -109.46, whereas with  
34 RevBayes it was -109.71. Small differences in the log-likelihoods are expected due  
35 to differences in the way diversitree and RevBayes calculate probabilities at the  
36 root, and also due to numerical approximations. However both reconstructions  
37 should return the same probabilities for ancestral states at the root, and indeed  
38 diversitree calculated the root probability of being in state 0 as 0.555 and RevBayes  
39 calculated it as 0.554. The estimated posterior probabilities are very close for all  
40 nodes. This is shown in a plot comparing the marginal posterior probabilities for  
41 all nodes being in state 1 as estimated by RevBayes against the diversitree  
42 estimates (Figure 1).

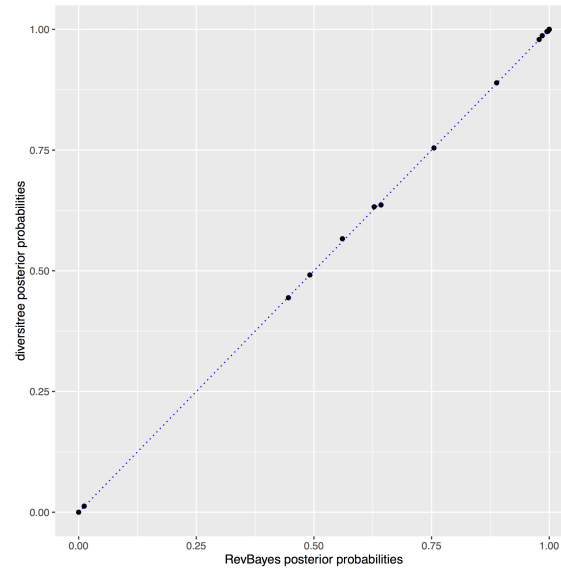

Figure 1: **Posterior probabilities of marginal ancestral state estimates.** Each point represents the marginal posterior probability of a node being in state 1 as estimated by RevBayes plotted against the estimates made by diversitree. The marginal ancestral states were estimated under BiSSE from a tree and tip data simulated with the following parameters:  $\lambda_0 = 0.2$ ,  $\lambda_1 = 0.4$ ,  $\mu_0 = 0.01$ ,  $\mu_1 = 0.1$ , and  $q_{01} = q_{10} = 0.1$ . The full ancestral state reconstructions from RevBayes and diversitree are shown in Figures 2 and 3, respectively.

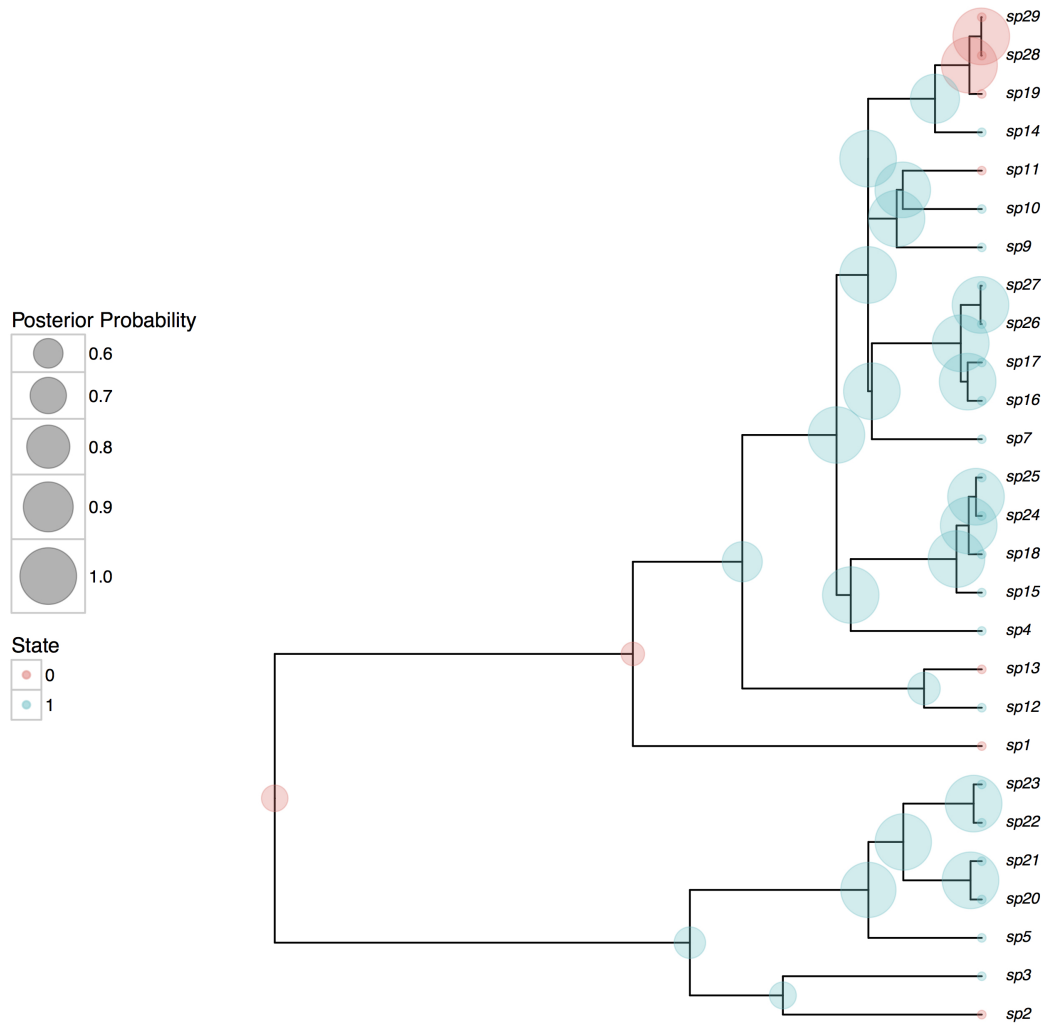

Figure 2: **Ancestral state estimates from RevBayes.** Marginal ancestral states estimated under BiSSE from a tree and tip data simulated with the following parameters:  $\lambda_0 = 0.2$ ,  $\lambda_1 = 0.4$ ,  $\mu_0 = 0.01$ ,  $\mu_1 = 0.1$ , and  $q_{01} = q_{10} = 0.1$ .

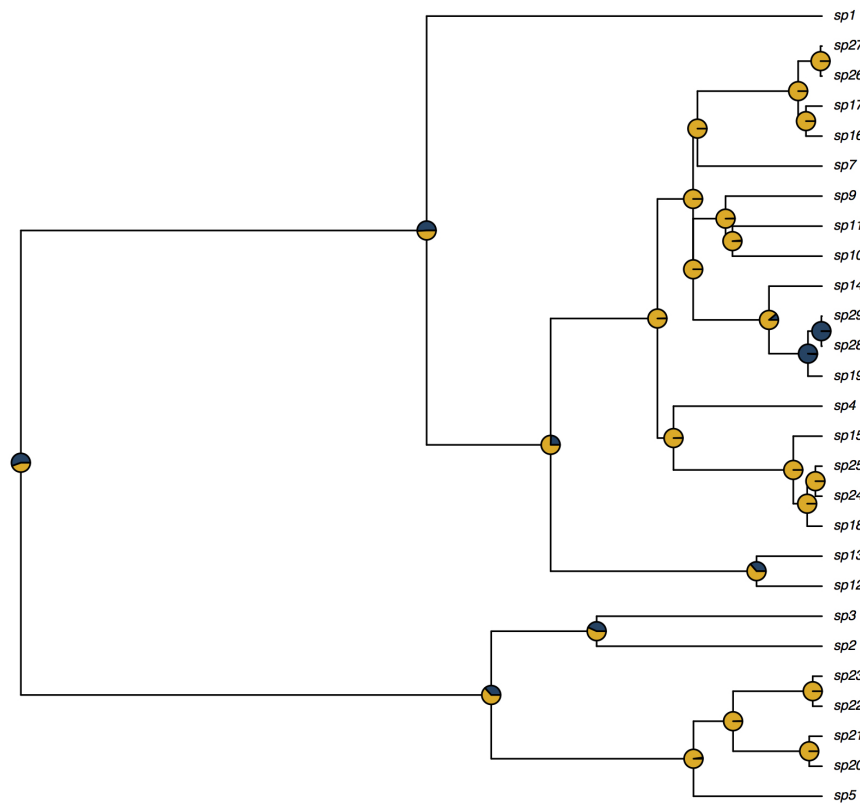

Figure 3: **Ancestral state estimates from diversitree.** Marginal ancestral states estimated under BiSSE from a tree and tip data simulated with the following parameters:  $\lambda_0 = 0.2$ ,  $\lambda_1 = 0.4$ ,  $\mu_0 = 0.01$ ,  $\mu_1 = 0.1$ , and  $q_{01} = q_{10} = 0.1$ .

## 43 APPENDIX 2: METROPOLIS-HASTINGS MOVES

44 The Metropolis-Hastings moves used in all ChromoSSE analyses are outlined  
45 in Table 1. All MCMC proposals are standard except the ElementSwapSimplex  
46 move and the reversible jump MCMC proposals. These are described in detail in  
47 the main text. MCMC analyses were run in RevBayes for 11000 iterations, where  
48 each iteration consisted of 79 MCMC moves per iteration. The 79 moves were  
49 randomly drawn from the 28 different Metropolis-Hastings moves listed in Table 1  
50 using the weights listed. Samples of parameter values and joint ancestral states  
51 were drawn each iteration, and the first 1000 samples were discarded as burn in.



Table 1: **MCMC moves used for chromosome number evolution analyses.** See the main text for further explanations of the moves used. Samples were drawn from the MCMC each iteration, where each iteration consisted of 28 different moves in a random move schedule with 79 moves per iteration.

|                        | Parameter                               | $X$                                             | Move                          | Weight                 |
|------------------------|-----------------------------------------|-------------------------------------------------|-------------------------------|------------------------|
| Anagenetic             | Chromosome gain rate                    | $\gamma_a$                                      | Scale( $\lambda = 1$ )        | 2                      |
|                        | Chromosome gain rate                    | $\gamma_a$                                      | Reduce/Augment                | 2                      |
|                        | Chromosome loss rate                    | $\delta_a$                                      | Scale( $\lambda = 1$ )        | 2                      |
|                        | Chromosome loss rate                    | $\delta_a$                                      | Reduce/Augment                | 2                      |
|                        | Polyploidization rate                   | $\rho_a$                                        | Scale( $\lambda = 1$ )        | 2                      |
|                        | Polyploidization rate                   | $\rho_a$                                        | Reduce/Augment                | 2                      |
|                        | Demi-polyploidization rate              | $\eta_a$                                        | Scale( $\lambda = 1$ )        | 2                      |
|                        | Demi-polyploidization rate              | $\eta_a$                                        | Reduce/Augment                | 2                      |
|                        | Linear component of gain rate           | $\gamma_m$                                      | Slide( $\delta = 0.1$ )       | 1                      |
|                        | Linear component of gain rate           | $\gamma_m$                                      | Slide( $\delta = 0.001$ )     | 1                      |
|                        | Linear component of gain rate           | $\gamma_m$                                      | Reduce/Augment                | 2                      |
|                        | Linear component of loss rate           | $\delta_m$                                      | Slide( $\delta = 0.1$ )       | 1                      |
|                        | Linear component of loss rate           | $\delta_m$                                      | Slide( $\delta = 0.001$ )     | 1                      |
|                        | Linear component of loss rate           | $\delta_m$                                      | Reduce/Augment                | 2                      |
|                        | Cladogenetic                            | No change                                       | $\phi_c$                      | Scale( $\lambda = 5$ ) |
| Chromosome gain        |                                         | $\gamma_c$                                      | Scale( $\lambda = 5$ )        | 2                      |
| Chromosome gain        |                                         | $\gamma_c$                                      | Reduce/Augment                | 2                      |
| Chromosome loss        |                                         | $\delta_c$                                      | Scale( $\lambda = 5$ )        | 2                      |
| Chromosome loss        |                                         | $\delta_c$                                      | Reduce/Augment                | 2                      |
| Polyploidization       |                                         | $\rho_c$                                        | Scale( $\lambda = 5$ )        | 2                      |
| Polyploidization       |                                         | $\rho_c$                                        | Reduce/Augment                | 2                      |
| Demi-polyploidization  |                                         | $\eta_c$                                        | Scale( $\lambda = 5$ )        | 2                      |
| Demi-polyploidization  |                                         | $\eta_c$                                        | Reduce/Augment                | 2                      |
| All cladogenetic rates |                                         | $\phi_c, \gamma_c, \delta_c, \rho_c, \eta_c$    | Joint Up-Down                 | 2                      |
| Other                  | Root frequencies                        | $\pi$                                           | BetaSimplex( $\alpha = 0.5$ ) | 10                     |
|                        | Root frequencies                        | $\pi$                                           | ElementSwapSimplex            | 20                     |
|                        | Relative-extinction                     | $r$                                             | Scale( $\lambda = 5$ )        | 3                      |
|                        | Relative-extinction and all clado rates | $r, \phi_c, \gamma_c, \delta_c, \rho_c, \eta_c$ | Joint Up-Down                 | 2                      |
|                        |                                         |                                                 | Scale( $\lambda = 0.5$ )      |                        |
| <b>Total</b>           |                                         |                                                 | <b>28</b>                     | <b>79</b>              |

52

## APPENDIX 3: SIMULATION DETAILS

53

### *Description of Simulation Experiments*

54 *Experiment 1.*—

55         In experiment 1 we tested the effect of unobserved speciation events due to  
56 extinction on chromosome number estimates when using a model that does not  
57 account for unobserved speciation. Is the additional model complexity required to  
58 account for unobserved speciation necessary, or are the effects of unobserved  
59 speciation negligible and safe to ignore? Using the non-SSE model described above  
60 that does not account for unobserved speciation, ancestral chromosome numbers  
61 and chromosome evolution model parameters were estimated for each of the 600  
62 datasets.

63 *Experiment 2.*—

64         Here we compared the accuracy of models of chromosome evolution that  
65 account for unobserved speciation versus those that do not. Since extinction can  
66 safely be assumed to be present to some extent in all clades, it is likely that all  
67 empirical datasets contain some unobserved speciation. Do we see an increase in  
68 accuracy when we account for unobserved speciation events, or conversely do we  
69 see an increase in the variance of our estimates that perhaps describes true  
70 uncertainty due to extinction? To test this, we estimated ancestral chromosome  
71 numbers and chromosome evolution model parameters over the simulated datasets

72 that included unobserved speciation using both ChromoSSE that accounts for  
73 unobserved speciation as well as the non-SSE model that does not.

74 *Experiment 3.*—

75 In experiment 3 we tested the effect of jointly estimating speciation and  
76 extinction rates with chromosome number evolution. Estimating speciation and  
77 extinction rates accurately is notoriously challenging (Nee et al. 1994; Rabosky  
78 2010; Beaulieu and O’Meara 2015; May et al. 2016), so how much of the variance in  
79 chromosome evolution estimates made with models that jointly estimate speciation  
80 and extinction are due to uncertainty in diversification rates? Here we compared  
81 our estimates of ancestral chromosome numbers and chromosome evolution model  
82 parameters using ChromoSSE that accounts for unobserved speciation (and in  
83 which speciation and extinction rates are jointly estimated) with estimates made  
84 from ChromoSSE but where the true rates of speciation and extinction used to  
85 simulate the data were fixed. The latter analyses were given the true rates of total  
86 speciation and extinction, but still had to estimate the proportion of speciation  
87 events for each type of cladogenetic event.

88 *Experiment 4.*—

89 Since we model the same chromosome number transitions as both  
90 cladogenetic and anagenetic processes, it is possible that the two processes could be  
91 confounded and our models may not be fully identifiable. Furthermore, preliminary  
92 results suggested our models overestimate anagenetic changes and underestimate  
93 cladogenetic changes when the true generating process includes cladogenetic

Table 2: **Simulation parameter values.** Parameter values used to simulate datasets. The top 3 rows show the 3 modes of chromosome number evolution simulated for Experiments 1, 2, 3, and 4: anagenetic only, cladogenetic only, and mixed. Row 4 shows the parameter values used to simulate data for Experiment 5. The total speciation rate  $\lambda_t = 0.25$  and the extinction rate  $\mu = 0.15$ . The root state was fixed to 8.

| Simulation mode | $\gamma_a$ | $\delta_a$ | $\rho_a$ | $\eta_a$ | $\gamma_m$ | $\delta_m$ | $\phi_c$        | $\gamma_c$      | $\delta_c$      | $\rho_c$        | $\eta_c$ |
|-----------------|------------|------------|----------|----------|------------|------------|-----------------|-----------------|-----------------|-----------------|----------|
| Anagenetic      | 0.0085     | 0.0085     | 0.0085   | -        | -          | -          | $\lambda_t$     | -               | -               | -               | -        |
| Cladogenetic    | -          | -          | -        | -        | -          | -          | $0.85\lambda_t$ | $0.05\lambda_t$ | $0.05\lambda_t$ | $0.05\lambda_t$ | -        |
| Mixed           | 0.0085     | 0.0085     | 0.0085   | -        | -          | -          | $0.85\lambda_t$ | $0.05\lambda_t$ | $0.05\lambda_t$ | $0.05\lambda_t$ | -        |
| Experiment 5    | 0.0025     | 0.0025     | 0.0025   | -        | -          | -          | $0.93\lambda_t$ | $0.02\lambda_t$ | $0.02\lambda_t$ | $0.02\lambda_t$ | -        |

94 evolution. Here we compared cladogenetic and anagenetic estimates made by  
95 ChromoSSE under simulation scenarios that only included cladogenetic changes.  
96 Do we see an increase in accuracy of cladogenetic parameter estimates when  
97 anagenetic changes are disallowed (fixed to 0)?

98 *Experiment 5.*—

99 Experiments 1-3 deal with the increase in uncertainty caused by unobserved  
100 speciation events due to extinction. Here we focused on the effect of unobserved  
101 speciation due to incomplete taxon sampling by comparing chromosome number  
102 estimates at 3 levels of taxon sampling: 100%, 50%, and 10%. We compared  
103 estimates made by both the ChromoSSE model and the non-SSE model, as well as  
104 compared estimates made by ChromoSSE using the true taxon sampling  
105 probability  $\rho_s$  versus estimates made by ChromoSSE using  $\rho_s$  fixed to 1.0.

106 *Methods Used to Simulate Data*

107 For experiments 1, 2, 3, and 4 the same set of simulated trees and  
108 chromosome counts were used. Since ChromoSSE assumes the total rates of  
109 speciation and extinction are fixed over the tree (see Equation 5 of the main text),  
110 trees were first simulated with constant diversification rates, and then cladogenetic  
111 and anagenetic chromosome evolution was simulated over the trees. 100 trees were  
112 simulated under the birth-death process with  $\lambda = 0.25$  and  $\mu = 0.15$  (see Figure 4)  
113 using the R package diversitree (FitzJohn 2012). The trees were conditioned on an  
114 age of 25.0 time units and a minimum of 10 extant lineages. To test the effect of  
115 unobserved speciation events due to lineages going extinct on cladogenetic  
116 estimates, chromosome number evolution was simulated along the trees including  
117 their extinct lineages (unpruned) and the same 100 trees but with the extinct  
118 lineages pruned. All chromosome number simulations were performed using  
119 RevBayes (Höhna et al. 2016).

120 Three models were used to generate simulated chromosome counts: a model  
121 where all chromosome evolution was anagenetic, a model where all chromosome  
122 evolution was cladogenetic, and a model that mixed both anagenetic and  
123 cladogenetic changes (Table 2). Parameter values were roughly informed by the  
124 mean values estimated from the empirical datasets. The mean length of the  
125 simulated trees was 253.5 (Figure 4). Hence, the anagenetic rates were set to  
126  $2/253.5 \approx 0.0085$  which corresponds to an expected value of 2 events over the tree  
127 for each of the four transition types. The root chromosome number was fixed to be  
128 8. Simulating data for all 3 models over both the pruned and unpruned tree  
129 resulted in 600 simulated datasets. To reproduce the effect of using reconstructed

130 phylogenies all inferences were performed using the trees with extinct lineages  
131 pruned and with chromosome counts from extinct lineages removed.

132         Since Experiment 5 focused on the effect of incomplete taxon sampling on  
133 chromosome number estimates, the trees used needed to be conditioned on a known  
134 number of extant tips. The trees used for the previous simulations were conditioned  
135 only on age and a minimum of 10 extant lineages and so were not appropriate. To  
136 simulate 100 trees conditioned on 200 extant lineages we used the R package  
137 TreeSim (Stadler 2011) with  $\lambda = 0.25$  and  $\mu = 0.15$  (like above). Complete trees  
138 with both extant and extinct lineages were simulated, and then chromosome  
139 evolution was simulated over the complete tree. Since these trees had a  
140 significantly longer mean length (2020.1 compared to 253.5) we used different rates  
141 of chromosome evolution to simulate data compared to Experiments 1, 2, 3, and 4  
142 (Table 2). Chromosome numbers were only simulated using a mixed anagenetic  
143 and cladogenetic model. The anagenetic rates were set to  $5/2020.1 \approx 0.0025$  which  
144 corresponds to an expected value of 5 events over the tree for each of the four  
145 transition types. Like Experiments 1, 2, 3, and 4, the root chromosome number was  
146 fixed to be 8. Once chromosome data was simulated over the complete trees, the  
147 extinct taxa were pruned off leaving trees with 100% taxon sampling. 50% of the  
148 tips were randomly pruned off to create trees with 50% taxon sampling, and 90% of  
149 the tips were randomly pruned off to create trees with 10% taxon sampling.

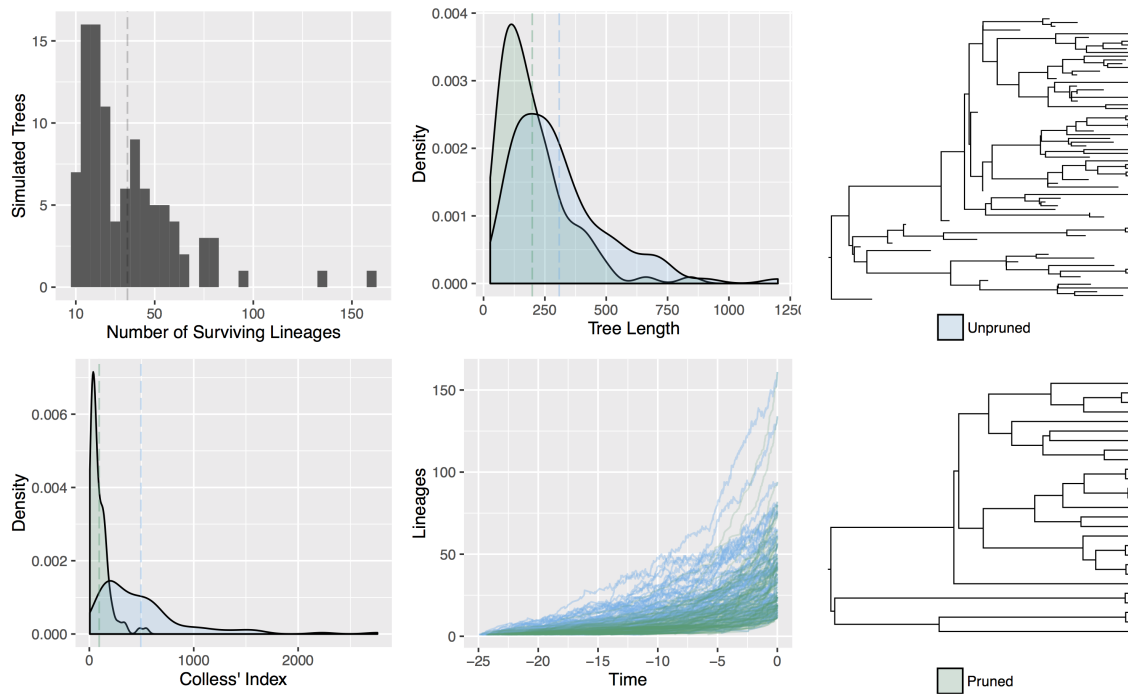

**Figure 4: Tree simulations.** 100 trees were simulated under the birth-death process as described in the main text for Experiments 1, 2, 3, and 4. Chromosome number evolution was simulated over the unpruned trees that included all extinct lineages, as well as over the same trees but with extinct lineages pruned. This resulted in two simulated datasets: one simulated under a process that did have unobserved speciation events, and one simulated with no unobserved speciation events. Shown above is a histogram of the number of lineages that survived to the present, the tree lengths, Colless' Index (a measure of tree imbalance; Colless 1982), and lineage through time plots of the 100 pruned and unpruned trees.

## 150 APPENDIX 4: MCMC CONVERGENCE OF SIMULATION 151 REPLICATES

152 Effective sample sizes (ESS) for all parameters in all simulation replicates  
153 were over 200, and the mean ESS values of the posterior for the replicates was  
154 1470.3. Since the space of possible models is so large (1024 possible models, see  
155 main text), we replicated all analyses that included unobserved speciation in  
156 Experiment 1 three independent times to ensure that MCMC convergence was not  
157 an issue in detecting the true model of chromosome number evolution used to  
158 simulate the data. The results displayed in Table 3 show that the percentage of  
159 simulation replicates in which the true model was inferred to be the MAP model,  
160 and the mean posterior of the true model, converged and were stable across all  
161 three independent runs.

Table 3: **Simulation Experiment 1 replicated 3 times.** Estimates of the true model that generated the simulated data and estimates of the posterior probability of the true model were stable and converged across multiple independent replicates of the experiment.

| Replicate | Mode of Evolution Used to Simulate Data | True Model Estimated (%) | Mean Posterior of True Model |
|-----------|-----------------------------------------|--------------------------|------------------------------|
| 1         | Cladogenetic                            | 15                       | 0.09                         |
| 1         | Anagenetic                              | 36                       | 0.12                         |
| 1         | Mixed                                   | 2                        | 0.10                         |
| 2         | Cladogenetic                            | 15                       | 0.09                         |
| 2         | Anagenetic                              | 36                       | 0.12                         |
| 2         | Mixed                                   | 2                        | 0.09                         |
| 3         | Cladogenetic                            | 15                       | 0.09                         |
| 3         | Anagenetic                              | 36                       | 0.12                         |
| 3         | Mixed                                   | 2                        | 0.10                         |



\*

162

163 References

164 Beaulieu, J. M. and B. C. O'Meara. 2015. Extinction can be estimated from  
165 moderately sized molecular phylogenies. *Evolution* 69:1036–1043.

166 Beaulieu, J. M. and B. C. O'Meara. 2016. Detecting hidden diversification shifts in  
167 models of trait-dependent speciation and extinction. *Systematic Biology*  
168 65:583–601.

169 Colless, D. H. 1982. Review of phylogenetics: the theory and practice of  
170 phylogenetic systematics. *Systematic Zoology* 31:100–104.

171 FitzJohn, R. G. 2012. Diversitree: comparative phylogenetic analyses of  
172 diversification in R. *Methods in Ecology and Evolution* 3:1084–1092.

173 Goldberg, E. E. and B. Igić. 2012. Tempo and mode in plant breeding system  
174 evolution. *Evolution* 66:3701–3709.

175 Höhna, S., M. J. Landis, T. A. Heath, B. Boussau, N. Lartillot, B. R. Moore, J. P.  
176 Huelsenbeck, and F. Ronquist. 2016. RevBayes: Bayesian phylogenetic inference  
177 using graphical models and an interactive model-specification language.  
178 *Systematic Biology* 65:726–736.

179 Maddison, W. P., P. E. Midford, and S. P. Otto. 2007. Estimating a binary  
180 character's effect on speciation and extinction. *Systematic Biology* 56:701–710.

181 May, M. R., S. Höhna, and B. R. Moore. 2016. A Bayesian approach for detecting  
182 the impact of mass-extinction events on molecular phylogenies when rates of  
183 lineage diversification may vary. *Methods in Ecology and Evolution* 7:947–959.

184 Nee, S., E. C. Holmes, R. M. May, and P. H. Harvey. 1994. Extinction rates can be  
185 estimated from molecular phylogenies. *Philosophical Transactions of the Royal  
186 Society B: Biological Sciences* 344:77–82.

187 Rabosky, D. L. 2010. Extinction rates should not be estimated from molecular  
188 phylogenies. *Evolution* 64:1816–1824.

189 Stadler, T. 2011. Simulating trees with a fixed number of extant species.  
190 *Systematic Biology* 60:676–684.
